# Supplementary material
Source: HighWire-hosted journal article supplement (https://bmjopen.bmj.com/content/15/5/e093620)
Supplement: inline-supplementary-material-1 [file inline-supplementary-material-1.pdf]

Supplementary appendix

S1: Description of all included studies.

| Authors' names<br>Year of publication<br>Title                                                                                                                  | Place where study was performed | Definition of migrant | Research question                                                     | Place of origin of migrants | Administrative status of migrants | Definition of adherence to care process:<br>*Treatment adherence<br>*Retention in care<br>*Virological response                                                                                                                | Study design                                                        | Study aim<br><br>/ Primary outcome (when clearly mentioned)                                                                                                                                                     | Study period            | Inclusion criteria                                                                                                                                                                                                                                                                                             | Number of participants |
|-----------------------------------------------------------------------------------------------------------------------------------------------------------------|---------------------------------|-----------------------|-----------------------------------------------------------------------|-----------------------------|-----------------------------------|--------------------------------------------------------------------------------------------------------------------------------------------------------------------------------------------------------------------------------|---------------------------------------------------------------------|-----------------------------------------------------------------------------------------------------------------------------------------------------------------------------------------------------------------|-------------------------|----------------------------------------------------------------------------------------------------------------------------------------------------------------------------------------------------------------------------------------------------------------------------------------------------------------|------------------------|
| <b>Abgrall 2013</b><br>Visiting One's Native Country : The Risks of Non adherence in HIV-Infected Sub-Saharan Migrants (1)                                      | Europe<br>France                | Not specified         | Study of the factors of adherence to the care process among migrants  | Africa                      | Not specified                     | Treatment adherence<br>Adherence to treatment = self-administered questionnaires (10 questions about adherence to ART)<br>3 categories (highly adherent (100%), moderately adherent (between 99% and 80%) non-adherent (<80%)) | Descriptive epidemiological studies (cross-sectional, longitudinal) | To describe the course of ART adherence before and during travel                                                                                                                                                | 2006-2009               | Aged at least 18 years; HIV viral load <200 cp/mL; unchanged combination ART regimen for at least 3 months prior to enrollment; ART: minimum 3 antiretroviral drugs with at least 1NNRTI or PI ; Planned visit to a sub-Saharan country for a period of between 2 weeks and 6 months, in the following 8 weeks | 268                    |
| <b>Abgrall 2014</b><br>Risk factors for adherence failure in HIV-infected sub-Saharan migrants living in France and travelling back to their native country (2) | Europe                          | Not specified         | Study of the factors of adherence to the care process among migrants  | Africa                      | Not specified                     | Treatment adherence<br>Adherence failure= switching from adherence (high or moderate, i.e., 80-100%, of prescribed tablets taken) to non-adherence (<80%).                                                                     | Descriptive epidemiological studies (cross-sectional, longitudinal) | To explore adherence related to geographical mobility                                                                                                                                                           | 2006-2009               | Migrants from sub-Saharan Africa; Living in France; pVL <200cp/ml 8 weeks before a planned two-week to six-month trip to a sub-Saharan country                                                                                                                                                                 | 200                    |
| <b>Arnold 2020</b><br>Documenting best practices for maintaining access to HIV prevention, care and treatment in an era of shifting                             | United States                   | Not specified         | Study of the factors of adherence to the care process among migrants. | Not specified               | Not specified                     | Loss to follow up; Treatment adherence                                                                                                                                                                                         | Qualitative study                                                   | To explore how access to prevention, care and treatment is maintained for immigrants impacted by HIV and living in California in a dynamic environment, where state and federal level policies may be in direct | May 2018 - January 2019 | Providers, case workers, advocates, Documented experts, and peer navigators in HIV prevention and care Clinics                                                                                                                                                                                                 | 20                     |

|                                                                                                                                                                                          |                       |                                                                                                                                                                                       |                                                                       |                                                                       |               |                                                                                                                                                          |                                                                     |                                                                                                                                   |                           |                                                                                                                                                           |     |
|------------------------------------------------------------------------------------------------------------------------------------------------------------------------------------------|-----------------------|---------------------------------------------------------------------------------------------------------------------------------------------------------------------------------------|-----------------------------------------------------------------------|-----------------------------------------------------------------------|---------------|----------------------------------------------------------------------------------------------------------------------------------------------------------|---------------------------------------------------------------------|-----------------------------------------------------------------------------------------------------------------------------------|---------------------------|-----------------------------------------------------------------------------------------------------------------------------------------------------------|-----|
| immigration policy and discourse (3)                                                                                                                                                     |                       |                                                                                                                                                                                       |                                                                       |                                                                       |               |                                                                                                                                                          |                                                                     | opposition to one another,                                                                                                        |                           |                                                                                                                                                           |     |
| <b>Arora 2024</b><br>Patient-reported outcomes and experiences of migrants enrolled in a multidisciplinary HIV clinic with rapid, free, and onsite treatment: the 'ASAP' study (4)       | Europe<br>Canada      | By region of birth                                                                                                                                                                    | Study of the factors of adherence to the care process among migrants. | Africa<br>Caribbean<br>Other                                          | Not specified | Treatment adherence with perceived compliance with clinician's treatment plans measured using the Generic Medical Interview Satisfaction Scale (G-MISS). | Cohort study                                                        | To explore patient-reported outcomes and experiences among migrants living with HIV                                               | January 2020-January 2021 | New treatment-naïve people living with HIV (PLWH)<br><br>Migrants<br><br>Participants were initiated on bicitgravir/embtricitabine/tenofovir alafenamide. | 35  |
| <b>Arrey 2017</b><br>Perceptions of stigma and discrimination in health care settings towards sub-Saharan African migrant women living with HIV/AIDS in Belgium: a qualitative study (5) | Europe<br>Belgium     | Not specified                                                                                                                                                                         | Study of the factors of adherence to the care process among migrants  | Africa                                                                | Not specified | Retention in care; Health-seeking behavior                                                                                                               | Qualitative study                                                   | To explore the causes, forms and consequences of HIV-related stigma and discrimination                                            | April 2013-December 2014  | SSA migrant women; over 18 years old; diagnosed HIV positive more than 3 months previously; English or French speaking; receiving care in Belgium         | 44  |
| <b>Been 2016</b><br>Risk Factors for Non-Adherence to cART in Immigrants with HIV living in the Netherlands: Results from the Rotterdam Adherence project (6)                            | Europe<br>Netherlands | First generation immigrants: participants born outside of Western Europe. Second generation immigrants: participants for whom one or both parents were born outside of Western Europe | Study of the factors of adherence to the care process among migrants  | Africa<br>South America<br>Central America<br>Not specified;<br>Other | Not specified | Treatment adherence                                                                                                                                      | Descriptive epidemiological studies (cross-sectional, longitudinal) | To assess socio-demographic and psychological risk factors for non-adherence to cART in immigrant PLWH enrolled in clinical care. | November 2012-July 2013   | First- and second-generation immigrants with HIV; aged 18 or older                                                                                        | 352 |
| <b>Been 2017</b><br>Self-reported adherence and                                                                                                                                          | Europe<br>Netherlands | First- and second-generation                                                                                                                                                          | Study of the factors of adherence to                                  | Africa<br>South America                                               | Not specified | Treatment adherence; Virological response                                                                                                                | Cohort study                                                        | To assess two methods-pharmacy refill adherence and self-reported adherence                                                       | November 2012-            | Included in the Rotterdam Adherence Project ; had to be                                                                                                   | 299 |

|                                                                                                                                                                               |                       |                                                                                          |                                                                                 |                                                                    |               |                                                                        |                                          |                                                                                                                                                                                                                                                                              |                                     |                                                                                                                                                                                                                        |      |
|-------------------------------------------------------------------------------------------------------------------------------------------------------------------------------|-----------------------|------------------------------------------------------------------------------------------|---------------------------------------------------------------------------------|--------------------------------------------------------------------|---------------|------------------------------------------------------------------------|------------------------------------------|------------------------------------------------------------------------------------------------------------------------------------------------------------------------------------------------------------------------------------------------------------------------------|-------------------------------------|------------------------------------------------------------------------------------------------------------------------------------------------------------------------------------------------------------------------|------|
| pharmacy refill adherence are both predictive of an undetectable viral load among HIV-infected migrants receiving cART (7)                                                    |                       | adult immigrants                                                                         | the care process among migrants.                                                | Central America<br>Caribbean<br>Other                              |               |                                                                        |                                          | - in order to determine their comparative predictive value for undetectable viral load                                                                                                                                                                                       | July 2013                           | sufficiently fluent in at least one the following languages: Dutch, English, French, Spanish or Portuguese                                                                                                             |      |
| <b>Been 2019</b><br>Anxiety, depression and treatment adherence among HIV-infected migrants (8)                                                                               | Europe<br>Netherlands | Not specified                                                                            | Study of the factors of adherence to the care process among migrants            | Africa;<br>South America/<br>Central America;<br>Caribbean         | Not specified | Treatment adherence                                                    | Cross-sectional study                    | To evaluate whether the HADS can be used in standard care of MLWH to measure psychological distress                                                                                                                                                                          | November 2012-<br>July 2013         | First- or second-generation immigrant; aged 18 years or older; diagnosed with HIV; had to be sufficiently fluent in one of the following languages: Dutch, English, French, Spanish or Portuguese                      | 306  |
| <b>Been 2020</b><br>Feasibility of four interventions to improve treatment adherence in migrants living with HIV in the Netherlands (9)                                       | Europe<br>Netherlands | People originating from a region outside of Western Europe (first or second generation). | Study of the factors of adherence to the care process among migrants            | Africa;<br>South America/<br>Central America<br>Caribbean<br>Other | Not specified | Treatment adherence<br>Virological response                            | Cohort study                             | To evaluate the feasibility of four interventions to improve HIV treatment and their efficacy if feasible: DAART (DAART, Directly administered antiretroviral therapy), GMA (Group medical appointments), screening and treatment of psychological distress and peer support | November 2012<br>July 2013          | People originating from a region outside of Western Europe (first or second generation); aged 18 years or older ; diagnosed with HIV ; sufficiently fluent in Dutch, English, French, Spanish, or Portuguese           | 234  |
| <b>Borchmann 2022</b><br>Length of stay in Denmark before HIV diagnosis and linkage to care: a population-based study of migrants living with HIV, Denmark, 1995 to 2020 (10) | Europe<br>Denmark     | Immigrants in Denmark who obtained residence status                                      | Study of the factors of adherence to the care process among migrants            | Africa<br>Southeast Asia<br>Other                                  | Documented    | Retention in care                                                      | Cohort study on mandatory reporting data | To determine the time from immigration to diagnosis of HIV infection and from HIV diagnosis to LTC, and to examine late presentation, stratified by migrant geographical region of origin and calendar period, in Denmark over a 25-year period                              | 1 January 1995 and 31 December 2020 | All individuals with HIV 1 in DHCS who immigrated to Denmark and obtained residence status, aged 16 years or older at time of first contact with an HIV healthcare center between 1 January 1995 and 31 December 2020. | 2166 |
| <b>Castelan 2023</b><br>Intentional but not Unintentional Medication Non-adherence was related with beliefs about medicines among                                             | Europe<br>Netherlands | Country of origin                                                                        | Migrant status as a risk or protective factor for adherence to the care process | Africa<br>Caribbean<br>Europe<br>Other                             | Not specified | Adherence evaluated using the 5-item Medication Adherence Report Scale | Cross-sectional study                    | To investigate the prevalence of unintentional and intentional non-adherence to ART                                                                                                                                                                                          | From April to July 2021             | Participants aged 18 years or older who were prescribed ART at the time of enrollment in the study.                                                                                                                    | 80   |

|                                                                                                                                                                           |                          |                                                                                                                                                                                                                                                                                                     |                                                                                                                                                                          |                                                                           |               |                                                                                                                                             |              |                                                                                                                                                                                                                                                                                           |                                  |                                                                                                                                                                                                                        |        |
|---------------------------------------------------------------------------------------------------------------------------------------------------------------------------|--------------------------|-----------------------------------------------------------------------------------------------------------------------------------------------------------------------------------------------------------------------------------------------------------------------------------------------------|--------------------------------------------------------------------------------------------------------------------------------------------------------------------------|---------------------------------------------------------------------------|---------------|---------------------------------------------------------------------------------------------------------------------------------------------|--------------|-------------------------------------------------------------------------------------------------------------------------------------------------------------------------------------------------------------------------------------------------------------------------------------------|----------------------------------|------------------------------------------------------------------------------------------------------------------------------------------------------------------------------------------------------------------------|--------|
| a multi-ethnic sample of people with HIV(11)                                                                                                                              |                          |                                                                                                                                                                                                                                                                                                     |                                                                                                                                                                          |                                                                           |               |                                                                                                                                             |              |                                                                                                                                                                                                                                                                                           |                                  |                                                                                                                                                                                                                        |        |
| <b>COHERE</b><br>Immunological and virological response to antiretroviral treatment in migrant and native men and women in Western Europe; is benefit equal for all? (12) | Europe                   | Geographical origin different from reporting country and grouped from the following categories: Western Europe and Western Countries (WEWC), Eastern Europe (EE), North Africa and Middle East (NAME), sub-Saharan Africa (SSA), Latin America (LA), Caribbean (CRB) and Asia/Oceanai s (Asia/Oce). | Migrant status as a risk or protective factor for adherence to the care process                                                                                          | Africa<br>Southeast Asia<br>South America<br>Central America<br>Caribbean | Not specified | Virological response                                                                                                                        | Cohort study | Aim: Evaluate differences in immunological and virological response to cART in HIV positive men and women to geographical origin in COHERE from 2004 to 2013.<br><br>Primary outcome: Time to virological response from cART initiation according to geographical origin in men and women | 1 January 1997<br>1 January 2004 | Antiretroviral-naïve patients; 18-74 years old; cART initiation; CD4 T-cell count and HIV RNA measurements in 6 months prior to c ART initiation; at least two CD4 T-cell count and HIV RNA measurements while on cART | 32817  |
| <b>Cyrus 2017</b><br>Disparity in Retention in Care and Viral Suppression for Black Caribbean-Born Immigrants Living with HIV in Florida (13)                             | United States<br>Florida | Non-Hispanic whites, US-born Blacks, Hispanics and foreign-Blacks from non-Spanish speaking Caribbean countries                                                                                                                                                                                     | Migrant status as a risk or protective factor for adherence to the care process;<br><br>Study of the factors of adherence to the care process among migrants,<br><br>And | Caribbean                                                                 | Not specified | Lost to follow-up; Virological response<br>Retention in care : engagement in care two or more times at least three months apart during 2015 | Cohort study | To assess the disparity of non-retention in HIV care and non-viral suppression for non-Hispanic Black Caribbean-born immigrants                                                                                                                                                           | 2000<br>2014                     | Case definition for HIV (CDC definition) ; Aged 13 years or older ; Non-Hispanic whites, US-born Blacks, Hispanics and foreign-Blacks from non-Spanish speaking Caribbean countries                                    | 56 119 |

|                                                                                                                                                                                                                        |                                 |                                                                                            |                                                                                 |                                                                            |               |                                                                                                                                                                                                                                                                                                                           |                                                                     |                                                                                                                                                                                                                                  |                          |                                                                                                                                                                                                         |      |
|------------------------------------------------------------------------------------------------------------------------------------------------------------------------------------------------------------------------|---------------------------------|--------------------------------------------------------------------------------------------|---------------------------------------------------------------------------------|----------------------------------------------------------------------------|---------------|---------------------------------------------------------------------------------------------------------------------------------------------------------------------------------------------------------------------------------------------------------------------------------------------------------------------------|---------------------------------------------------------------------|----------------------------------------------------------------------------------------------------------------------------------------------------------------------------------------------------------------------------------|--------------------------|---------------------------------------------------------------------------------------------------------------------------------------------------------------------------------------------------------|------|
|                                                                                                                                                                                                                        |                                 |                                                                                            | Among migrants, study of the factors of adherence to the care process           |                                                                            |               |                                                                                                                                                                                                                                                                                                                           |                                                                     |                                                                                                                                                                                                                                  |                          |                                                                                                                                                                                                         |      |
| <b>Dang 2012</b><br>Sociocultural and Structural Barriers to Care Among Undocumented Latino Immigrants with HIV Infection (14)                                                                                         | United States<br>Houston, Texas | Hispanic/Latino ethnicity as determined by country of origin, entry into the US after 1994 | Study of the factors of adherence to the care process among migrants            | South America/<br>Central America                                          | Undocumented  | Loss to follow up; Retention in care                                                                                                                                                                                                                                                                                      | Qualitative study                                                   | To examine the circumstantial, situational and social factors that uniquely affect entry and retention in care for undocumented Latinos                                                                                          | June 2006<br>August 2006 | HIV infected; age 18 years or older; Hispanic/Latino ethnicity as determined by country of origin, entry into the US after 1994 ; undocumented status ; residence in one of the 6 Houston EMA countries | 22   |
| <b>Demeke 2018</b><br>HIV Infection-Related Care Outcomes among US-born and Non-US born Blacks with Diagnosed HIV in 40 US Areas: The national HIV Surveillance system, 2016 (15)                                      | United States                   | Non-US-born                                                                                | Migrant status as a risk or protective factor for adherence to the care process | Africa; Asia<br>South America<br>Central America<br>Caribbean              | Not specified | Retention in HIV infection-related medical care: Documentation of $\geq 2$ CD4 or VL test performed $\geq 3$ months apart during 2015                                                                                                                                                                                     | Cross-sectional study                                               | To examine the distribution of HIV care outcomes among US-born and non-US-born blacks, specifically, late diagnosis, linkage to HIV infection-related medical care after HIV diagnosis, retention in care, and viral suppression | 2015-2017                | Data from the Medical Monitoring Project Data                                                                                                                                                           | 1054 |
| <b>Demeke 2021</b><br>Antiretroviral prescription, retention in care and viral suppression according to place of birth among adults with diagnosed HIV in the United States 2015-2017, medical monitoring project (16) | United States                   |                                                                                            | Migrant status as a risk or protective factor for adherence to the care process | Africa<br>Southeast Asia<br>South America/<br>Central America<br>Caribbean | Not specified | Retention in care<br>Treatment adherence<br>Virological response<br>Retention in care: documentation of two outpatient HIV visits at least 90 days apart in the previous 12 months<br>Adherence: never missed a dose in the previous 30 days<br>Virological response: Sustained viral suppression: all viral loads in the | Descriptive epidemiological studies (cross-sectional, longitudinal) | To describe HIV outcomes among US-born and non-US-born persons, and examined sociodemographic and behavioral factors in both populations that may influence these outcomes                                                       | June 2015<br>May 2017    | HIV; aged 18 years and older                                                                                                                                                                            | 7617 |

|                                                                                                                                                                          |                  |                                                                                                                                                     |                                                                                 |                      |               |                                                                                                                                                                                  |              |                                                                                                                                                                                                                                                    |                                    |                                                                                                                                                                                                                                                                                                                                                                                                                                                                                                                                                                                                                                                                                                |       |
|--------------------------------------------------------------------------------------------------------------------------------------------------------------------------|------------------|-----------------------------------------------------------------------------------------------------------------------------------------------------|---------------------------------------------------------------------------------|----------------------|---------------|----------------------------------------------------------------------------------------------------------------------------------------------------------------------------------|--------------|----------------------------------------------------------------------------------------------------------------------------------------------------------------------------------------------------------------------------------------------------|------------------------------------|------------------------------------------------------------------------------------------------------------------------------------------------------------------------------------------------------------------------------------------------------------------------------------------------------------------------------------------------------------------------------------------------------------------------------------------------------------------------------------------------------------------------------------------------------------------------------------------------------------------------------------------------------------------------------------------------|-------|
|                                                                                                                                                                          |                  |                                                                                                                                                     |                                                                                 |                      |               | previous 12 months undetectable or <200 copies/ml                                                                                                                                |              |                                                                                                                                                                                                                                                    |                                    |                                                                                                                                                                                                                                                                                                                                                                                                                                                                                                                                                                                                                                                                                                |       |
| <b>De Monteynard 2015</b><br>Late cART initiation in Migrant Men from Sub-Saharan Africa without advanced HIV disease in France (17)                                     | Europe<br>France | Anyone born and having lived outside France and now residing in France, irrespective of their nationality and their length of stay in France        | Migrant status as a risk or protective factor for adherence to the care process | Africa<br>Other      | Not specified | Virological response                                                                                                                                                             | Cohort       | To compare the time to cART initiation and the types of cART regimens prescribed for migrants and non-migrants without access to care at an advanced stage of HIV disease in French Hospital                                                       | 1 January 2002 to 31 December 2010 | Documented HIV 1 or HIV 2 infection; follow up in an FHDH participating center; written informed consent ; aged at least 16 years ; with CD4 cell counts above 200/micromol/ML ; no previous or current AIDS event at enrolment or within the first three months after enrollment.<br><br>Exclusion criteria:<br>c ART regimen initiated because of pregnancy; participated in a double-blind clinical trial of antiretroviral therapy during follow up; single or dual NRTI before first-line c ART ; lost to follow or died within the first six months after FHDH enrolment ; no immunovirological assessment during the first three months and fewer than two assessments during follow-up | 13338 |
| <b>De Monteynard 2016</b><br>Influence of geographic origin, sex, and HIV transmission group on the outcome of first-line combined antiretroviral therapy in France (18) | Europe<br>France | Based on the United Nations' definition: "Anyone born and having lived outside France and now residing in France, irrespective of their nationality | Migrant status as a risk or protective factor for adherence to the care process | Africa;<br>Caribbean | Not specified | Lost to follow-up; Virological response<br><br>Lost to follow-up was defined as an interval of more than 18 months between the last follow-up visit and the last database update | Cohort study | To compare virological, immunological, and clinical outcomes after first-line cART initiation between HIV-1 infected migrants originating from SSA or non-French West Indies and French natives (NFW), according to sex and HIV transmission group | 1 January 2006 to 31 December 2011 | All ART naive HIV-1 infected individuals aged at least 16 years; originated from France, SSA or NFW ; enrolled in the FHDH (French Hospital Database on HIV) ; started cART between 01 January 2006 and 31 December 2011 ; at treatment initiation, at least 1 year prior to the last database                                                                                                                                                                                                                                                                                                                                                                                                 | 9746  |

|                                                                                                                                             |               |                                     |                                                                                 |                   |                          |                                                                                                                                                                                         |              |                                                                                                                                                                                                                                                                                       |                                  |                                                                                                                                                                                                                                    |      |
|---------------------------------------------------------------------------------------------------------------------------------------------|---------------|-------------------------------------|---------------------------------------------------------------------------------|-------------------|--------------------------|-----------------------------------------------------------------------------------------------------------------------------------------------------------------------------------------|--------------|---------------------------------------------------------------------------------------------------------------------------------------------------------------------------------------------------------------------------------------------------------------------------------------|----------------------------------|------------------------------------------------------------------------------------------------------------------------------------------------------------------------------------------------------------------------------------|------|
|                                                                                                                                             |               | and their length of stay in France” |                                                                                 |                   |                          |                                                                                                                                                                                         |              |                                                                                                                                                                                                                                                                                       |                                  | update, patients had to have at least one available CD4+ cell count and one plasma viral load (pVL) measurement obtained within the previous 6 months.<br><br>Exclusion criterion: first cART regimen was prescribed for pregnancy |      |
| <b>Elbirt 2014</b><br>Direct monthly highly active antiretroviral therapy supply: a method to increase patient's adherence and outcome (19) | Other Israel  | Immigrants from Ethiopia            | Study of the factors of adherence to the care process among migrants.           | Africa            | Not specified            | Treatment adherence<br>Virological response<br>Retention in Care                                                                                                                        | Cohort study | Initiate a "modified DOT" project supplying ART directly to patients in a clinic, once a month; the authors expected that the implementation of a "modified DOT" program would increase patients' adherence to treatment and would lead to virological and immunological improvement. | Not Specified                    | -Adult (over 18 years of age)<br>-diagnosis of HIV by ELISA and confirmed by western blot analysis<br>-prescribed ART for at least 2 years prior to study initiation                                                               | 385  |
| <b>Elinav 2012</b><br>HIV/AIDS profile and realities at a regional antiretroviral therapy clinic in Jerusalem: 12 years analysis (20)       | Israel        | Not specified                       | Migrant status as a risk or protective factor for adherence to the care process | Africa            | Documented; Undocumented | Lost to follow-up<br>Lost to follow-up: if patient had had $\leq 2$ total clinical visits (no clinical visits following HIV diagnosis).                                                 | Cohort study | To compare adherence to follow up, treatment outcome, and development of resistance in the 3 groups of patients seen at an AIDS clinic over a 12-year period                                                                                                                          | 1 January 1995<br>1 January 2007 | All patients who initiated ART during the 12 years of analysis<br><br>Exclusion criterion: patients attending fewer than 2 visits/year                                                                                             | 134  |
| <b>Fournier 2019</b><br>Incidence of risk factors for medical care interruption in people living with HIV in recent years (21)              | Europe France | Country of Birth                    | Migrant status as a risk or protective factor for adherence to the care process | Africa; Other     | Not specified            | Lost to follow-up<br>Medical care interruption = not seeking care in or outside the clinic for at least 18 months irrespective of whether they returned to care after the interruption. | Cohort study | To estimate the annual incidence rate of medical care interruption (MCI)<br><br>Outcome: incidence rate of MCI                                                                                                                                                                        | January 2010<br>October 2014     | 18 years old ; had attended the clinic at least twice between January to 2010 and October 2014                                                                                                                                     | 4796 |
| <b>Gagliardini 2024</b><br>Impact of                                                                                                        | Europe Italy  | Being born outside of               | Migrant status as a                                                             | Africa, Southeast | Not specified            | Temporary LTFU was defined as the                                                                                                                                                       | Cohort study | To estimate the risk of temporary loss to follow-up                                                                                                                                                                                                                                   | 1.03.2018                        | People with HIV, at least 18 years old                                                                                                                                                                                             | 8864 |

|                                                                                                                                                                                  |               |                                                                                                         |                                                                                 |                                                        |               |                                                                                                                                                                                                                                                                                        |              |                                                                                                                                                                                                                                                                                                                                                                                                                 |                              |                                                                                                                                                                                                                                                                                                                                                                  |      |
|----------------------------------------------------------------------------------------------------------------------------------------------------------------------------------|---------------|---------------------------------------------------------------------------------------------------------|---------------------------------------------------------------------------------|--------------------------------------------------------|---------------|----------------------------------------------------------------------------------------------------------------------------------------------------------------------------------------------------------------------------------------------------------------------------------------|--------------|-----------------------------------------------------------------------------------------------------------------------------------------------------------------------------------------------------------------------------------------------------------------------------------------------------------------------------------------------------------------------------------------------------------------|------------------------------|------------------------------------------------------------------------------------------------------------------------------------------------------------------------------------------------------------------------------------------------------------------------------------------------------------------------------------------------------------------|------|
| COVID-19 pandemic on retention in care of native and migrant people with HIV in the ICONA cohort (22)                                                                            |               | Italy, based on their geographical origin (derived from nationality or from country of birth or origin) | risk or protective factor for adherence to the care process                     | Asia, South America, Central America                   |               | absence in the ICONA database of the record of information about HIV-1 RNA, CD4 cell count determination, laboratory exams, ART modification, clinical visit or clinical event for at least one year.                                                                                  |              | in natives versus migrant people with HIV as a result of the impact of the COVID-19 pandemic on social factors and health care                                                                                                                                                                                                                                                                                  | - 11 May 2023                | enrolled in ICONA Foundation Study, with active follow-up in the study-defined periods.                                                                                                                                                                                                                                                                          |      |
| <b>Gatey 2019</b><br>Does region of origin influence the timing and outcome of first-line antiretroviral therapy in France ? (23)                                                | Europe France | Region of origin                                                                                        | Migrant status as a risk or protective factor for adherence to the care process | Africa; Other                                          | Not specified | Virological response<br>Viral suppression at 12 months                                                                                                                                                                                                                                 | Cohort study | To assess whether cART initiation and drug choice in naive patients reflected the most recent national recommendations, and more specifically whether cART differed in African migrants versus European natives in 13 hospitals in the north and east of Paris area participating in the Nadis ® cohort<br><br>Outcome<br>Virological success= achievement of VL ≤ 50 copies/ml 12 months after cART initiation | 1 January 2014 31 March 2015 | Antiretroviral therapy-naïve HIV 1 infected adults aged ≥18 years, from 15 hospital wards in the north and east of Paris area participating in the Nadis cohort in 2014, with at least two follow-up visits between 1 January 2014 and 31 March 2015.<br><br>Exclusion criterion:<br><br>patients who participated in a clinical trial on antiretroviral therapy | 451  |
| <b>Gebreegziabher 2020</b><br>The role of Neighborhood Poverty in the Association between Foreign-Born status and HIV Care Continuum Outcomes in Alameda County, California (24) | United States | Foreign born status                                                                                     | Migrant status as a risk or protective factor for adherence to the care process | Africa; Southeast Asia; South America/ Central America | Not specified | Retention in care; Virological response<br><br>Retention in care =having had two or more visits that were 90 or more days apart in the year after a person was diagnosed<br><br>Virological response: having fewer than 75 copies/ml of HIV virus in the blood in the last test in the | Cohort study | To describe relationship between foreign-born status and late diagnosis, linkage to care within 30 days diagnosis, retention in HIV care a year after diagnosis and achievement of undetectable viral load a year after diagnosis<br><br>And to (2) examine whether the association between foreign-born status and these outcomes was modified by the percent living in poverty in the census tract            | 2011-2016                    | PLHIV; diagnosed between 2011 and 2016;in Alameda County; had a non-missing place of birth and census tract; no missing value for the respective outcomes                                                                                                                                                                                                        | 1235 |



|                                                                                                                              |                           |                                                   |                                                                                 |                                        |               | year after diagnosis.                                                                                                                                                                                                                                                                                                                                                                                                                                                                                                                                                      |                   | Outcome:<br>retention in care and<br>undetectable viral load                                                                                                                                                                                                                                                                       |                                    |                                                                                                         |       |
|------------------------------------------------------------------------------------------------------------------------------|---------------------------|---------------------------------------------------|---------------------------------------------------------------------------------|----------------------------------------|---------------|----------------------------------------------------------------------------------------------------------------------------------------------------------------------------------------------------------------------------------------------------------------------------------------------------------------------------------------------------------------------------------------------------------------------------------------------------------------------------------------------------------------------------------------------------------------------------|-------------------|------------------------------------------------------------------------------------------------------------------------------------------------------------------------------------------------------------------------------------------------------------------------------------------------------------------------------------|------------------------------------|---------------------------------------------------------------------------------------------------------|-------|
| <b>Guionnet 2014</b><br>Immigrant women living with HIV in Spain: a qualitative approach to encourage medical follow-up (25) | Spain                     | Immigrant                                         | Study of the factors of adherence to the care process among migrants            | Africa; South America/ Central America | Not specified | Lost to follow-up; Retention in care; Treatment adherence                                                                                                                                                                                                                                                                                                                                                                                                                                                                                                                  | Qualitative study | To describe the barriers and facilitators of social, cultural and psychological origin that affect the medical management and follow-up treatment of HIV positive immigrant women in Spain                                                                                                                                         | January 2012<br><br>July 2012      | First generation sub-Saharan and Latin American Immigrants                                              | 26    |
| <b>Helleberg 2013</b><br>HIV Care in the Swedish-Danish HIV cohort 1995-2010, Closing the Gaps (26)                          | Europe Sweden and Denmark | According to the Danish Civil Registration System | Migrant status as a risk or protective factor for adherence to the care process | Not specified                          | Not specified | Lost to follow-up; Retention in care; Virological response<br><br>Retention in care = visiting an HIV care center and/or VL or CD4 count measurement in the 13 months before 1 July 2010. Virological response: Successfully managed: patient had initiated HAART and VL≤ 500 copies/ml or initiated HAART at 6 months or patients were not eligible for HAART according to the national guidelines Inadequate monitoring: patient had initiated HAART, but no monitoring of VL for ≥ 13 months -patient had not initiated HAART and no CD4 count measured for ≥13 months. | Cohort study      | To evaluate the treatment status of HIV infected individuals enrolled in care as well as changes in the proportions who were successfully managed in Sweden and Denmark in the period 1995-2010.<br><br>To assess the proportion of HIV-infected individuals who received services along the continuum of care in Denmark in 2010. | 1 January 2015<br>1 September 2010 | ≥18 years of age; diagnosed and treated in Denmark or in one of the three largest HIV centers in Sweden | 10136 |

|                                                                                                                                                                                                |                         |                                             |                                                                                                                                                             |                                                                          |                          |                                                                                                                                                                                           |                       |                                                                                                                                                                                                                                                    |                                   |                                                                                                          |     |
|------------------------------------------------------------------------------------------------------------------------------------------------------------------------------------------------|-------------------------|---------------------------------------------|-------------------------------------------------------------------------------------------------------------------------------------------------------------|--------------------------------------------------------------------------|--------------------------|-------------------------------------------------------------------------------------------------------------------------------------------------------------------------------------------|-----------------------|----------------------------------------------------------------------------------------------------------------------------------------------------------------------------------------------------------------------------------------------------|-----------------------------------|----------------------------------------------------------------------------------------------------------|-----|
| <b>Herrmann 2012</b><br>The impact of visa status and Medicare eligibility on people diagnosed with HIV in Western Australia (27).                                                             | Australia               | Born outside Australia                      | Study of the factors of adherence to the care process among migrants                                                                                        | Africa; Southeast Asia                                                   | Undocumented             | Treatment adherence                                                                                                                                                                       | Qualitative study     | To understand the impact of HIV diagnosis on visa holders and the broader implications that temporary resident status has for them and their families. To describe the experiences and outcomes of antiretroviral in those without Medicare access | April 2010 August 2011            | Ineligible for Medicare                                                                                  | 22  |
| <b>Ivanova 2016</b><br>Preliminary Findings on the Association Between Symptoms of Depression and Adherence to Antiretroviral Therapy in Individuals Born Inside Versus Outside of Canada (28) | Canada                  | Not specified                               | Migrant status as a risk or protective factor for adherence to the care process<br><br>Study of the factors of adherence to the care process among migrants | Africa; Southeast Asia; South America/ Central America; Caribbean; Other | Not specified            | Treatment adherence<br>Treatment adherence was measured using the Center for Adherence Support Evaluation (CASE) Adherence Index                                                          | Cross-sectional study | Hypothesized that country of birth (Canada vs. not Canada) would moderate the relationship between higher depression and lower adherence to ART and that this relationship would be stronger for those born outside of Canada                      | Not specified                     | Infected with HIV; taking ART for at least 6 months ; at least 18 years of age ; being fluent in English | 57  |
| <b>Jaries 2017</b><br>Population movements and the HIV cascade in recently diagnosed patients at the French Guiana-Suriname Border (29)                                                        | Europe<br>French Guiana | Country of birth                            | Migrant status as a risk or protective factor for adherence to the care process                                                                             | Suriname<br>Brazil<br>Guyana<br>Haiti<br>Dominican Republic              | Documented; Undocumented | Lost to follow-up<br>Lost to follow-up: if patients had not consulted for >6 months<br>4 stages for HIV cascade: "HIV diagnosed", "Linked to HIV care", "on ART", "Suppressed viral load" | Cohort study          | To describe the characteristics of newly diagnosed HIV-patients in western Guiana, to construct the HIV care cascade and to compare it with the Surinamese one                                                                                     | 1st January 2011 31 December 2012 | All patients aged over 15 years; newly diagnosed with HIV infection in western French Guiana             | 121 |
| <b>Kankou 2019</b><br>Factors Associated with Virological Rebound in HIV-Positive Sub-Saharan Migrants Living in France After Traveling Back to Their Native Country:                          | Europe<br>France        | Native sub-Saharan persons living in France | Among migrants, study of the factors of adherence to the care process                                                                                       | Africa                                                                   | Not specified            | Virological response<br>Virological rebound during travel in the origin country                                                                                                           | Cohort study          | To assess factors associated with virological rebound in individuals included in the ANRS-VIHVO study                                                                                                                                              | 2006-2009                         | Patients from the ANRS-VIHVO study; with pVL below 50 copies/ml                                          | 237 |

|                                                                                                                     |                  |                                                                                                                                                                                                                                                           |                                                                                 |                                                        |               |                                                                                                                                                                                                                                                                                                                                                                                                                 |                             |                                                                                                                                                                                                                                                                                                                                                                                                                                   |                                |                                                                                                               |      |
|---------------------------------------------------------------------------------------------------------------------|------------------|-----------------------------------------------------------------------------------------------------------------------------------------------------------------------------------------------------------------------------------------------------------|---------------------------------------------------------------------------------|--------------------------------------------------------|---------------|-----------------------------------------------------------------------------------------------------------------------------------------------------------------------------------------------------------------------------------------------------------------------------------------------------------------------------------------------------------------------------------------------------------------|-----------------------------|-----------------------------------------------------------------------------------------------------------------------------------------------------------------------------------------------------------------------------------------------------------------------------------------------------------------------------------------------------------------------------------------------------------------------------------|--------------------------------|---------------------------------------------------------------------------------------------------------------|------|
| ANRS-VIHVO 2006-2009 Study (30)                                                                                     |                  |                                                                                                                                                                                                                                                           |                                                                                 |                                                        |               |                                                                                                                                                                                                                                                                                                                                                                                                                 |                             |                                                                                                                                                                                                                                                                                                                                                                                                                                   |                                |                                                                                                               |      |
| <b>Krankowska 2024</b><br>Comparison between patients who interrupted ART and those with late HIV diagnosis (31)    | Europe<br>Poland | A migrant was defined according to the United Nations definition as anyone who has moved across an international border from his/her usual place of residency, irrespective of his/her's administrative status, cause for movement and the length of stay | Migrant status as a risk or protective factor for adherence to the care process | Not specified                                          | Not specified | Treatment adherence; Antiretroviral discontinuation was defined as at least 30 consecutive days without taking antiretroviral treatment.                                                                                                                                                                                                                                                                        | Retrospective cohort study. | To compare those who discontinued ART and reappeared in medical care with those with new late HIV diagnosis.<br>To see if any risk factors for ART interruption could be improved through retention in care and individualization of treatment of patients with HIV                                                                                                                                                               | January 2020 and December 2021 | Included patients with HIV, under the care of one of the University Clinics of Infectious Diseases in Poland. | 215  |
| <b>Keiser 2012</b><br>Outcomes of Antiretroviral Therapy in the Swiss HIV Cohort Study: Latent Class Analysis (32). | Europe<br>Swiss  | Not specified                                                                                                                                                                                                                                             | Migrant status as a risk or protective factor for adherence to the care process | Africa; Southeast Asia; South America/ Central America | Not specified | Lost to follow-up; Treatment adherence; Virological response<br><br>Virological definition: suppression of HIV-1 viral load to <50 copies/ml at 6 months after starting ART among patients who were followed for at least 6 months<br><br>Lost to follow-up : if the last visit was more than 14 months before the closing date of the database and the patient was not known to have died<br><br>Adherence : 2 | Cohort study                | To examine (1) meaningful, distinct socio-demographic and behavioral groups can be identified in the Swiss HIV Cohort Study (SHCS) through latent class analysis (LCA)<br>(2) if these groups differ from the main HIV transmission groups and include groups that are not directly observable using a single variable approach (3); group membership is associated with relevant treatment variables and with treatment outcomes | January 2000<br>August 2008    | Enrolled in the Swiss HIV Cohort Study; treatment naive; initiated ART at or after enrollment                 | 4483 |

|                                                                                                                                                                              |                             |                                                                                                                                                       |                                                                                                                                                                                                                                       |                                                                   |                          |                                                                                                                                                                                                                                                                                                        |              |                                                                                                                                                                                                                                                                                                                           |                               |                                                                                                                                                                                                                                                                                                                                                           |     |
|------------------------------------------------------------------------------------------------------------------------------------------------------------------------------|-----------------------------|-------------------------------------------------------------------------------------------------------------------------------------------------------|---------------------------------------------------------------------------------------------------------------------------------------------------------------------------------------------------------------------------------------|-------------------------------------------------------------------|--------------------------|--------------------------------------------------------------------------------------------------------------------------------------------------------------------------------------------------------------------------------------------------------------------------------------------------------|--------------|---------------------------------------------------------------------------------------------------------------------------------------------------------------------------------------------------------------------------------------------------------------------------------------------------------------------------|-------------------------------|-----------------------------------------------------------------------------------------------------------------------------------------------------------------------------------------------------------------------------------------------------------------------------------------------------------------------------------------------------------|-----|
|                                                                                                                                                                              |                             |                                                                                                                                                       |                                                                                                                                                                                                                                       |                                                                   |                          | questions at every visit                                                                                                                                                                                                                                                                               |              |                                                                                                                                                                                                                                                                                                                           |                               |                                                                                                                                                                                                                                                                                                                                                           |     |
| <b>Kinoshita 2018</b><br>Migrant patients living with HIV/AIDS in Japan: Review of factors associated with high dropout rate in a leading medical institution in Japan (33). | Other Japan                 | Non-Japanese: nationality of birth, irrespective of country of origin.<br><br>Migrants naturalized in Japan grouped in original nationality by birth. | Migrant status as a risk or protective factor for adherence to the care process;<br>Among migrants, study of the factors of adherence to the care process<br><br>Study of the factors of adherence to the care process among migrants | Africa; Southeast Asia; South America/ Central America; Caribbean | Documented; Undocumented | Lost to follow-up;<br>Retention in care<br><br>-Retention in care: Number of days from the initial date of visit to the last date of the visit or December 31st, 2015, whichever came first<br>-Loss to follow-up: those who did not attend an appointment without prior notice for more than one year | Cohort study | To review the factors associated with retention of patients of foreign origin in HIV/AIDS care, and to evaluate the effectiveness of current approaches for migrant patients at the authors' outpatient clinic (OPC)                                                                                                      | January 2011<br>December 2014 | Patients who did not require the routinely-applied clinical care during the initial visit                                                                                                                                                                                                                                                                 | 551 |
| <b>Lefebvre 2014</b><br>Antiretroviral treatment outcomes among foreign-born and Aboriginal peoples living with HIV/AIDS in northern Alberta (34).                           | Canada                      | Not specified                                                                                                                                         | Migrant status as a risk or protective factor for adherence to the care process                                                                                                                                                       | Not specified                                                     | Not specified            | Virological response<br><br>Viral suppression: one viral load test <400 copies/mL ≤ 6 months after starting ART                                                                                                                                                                                        | Cohort study | To report the probability of achieving virological success in foreign-born (FB), Canadian-born aboriginal (CBA), Canadian-born non-aboriginal (CBNA) patients prescribed once-daily ART from 2006-2012. Among those patients who achieved virological suppression, to compare the rates of subsequent virological failure | 1 January 2006<br>1 July 2012 | Started ART between 1 January 2006 and 1 January 2012; previously ART naive; receiving once-daily ART; ≥18 years of age when starting ART<br><br>Exclusion criteria: missing country of birth data; missing baseline viral load data; baseline viral load <400 copies/mL; had < 6 months follow up time ; started ART ≤ 26 weeks before delivering a baby | 322 |
| <b>Levison 2017</b><br>Foreign-born status as a predictor of                                                                                                                 | United States Massachusetts | Foreign-born                                                                                                                                          | Migrant status as a risk or protective                                                                                                                                                                                                | Not specified                                                     | Not specified            | Lost to follow-up;<br>Retention in care;<br>Virological response                                                                                                                                                                                                                                       | Cohort study | To characterize linkage, retention, and virological suppression in foreign-born compared with US-born                                                                                                                                                                                                                     | 2002                          | Age <18 years; Electronic medical record reviews no evidence of new                                                                                                                                                                                                                                                                                       | 619 |

|                                                                                                                                                                |                  |                                                                                                           |                                                                      |                                                                                                 |               |                                                                                                                                                                                                                         |                                |                                                                                                                                                                                                                                                                         |                           |                                                                                                                                  |     |
|----------------------------------------------------------------------------------------------------------------------------------------------------------------|------------------|-----------------------------------------------------------------------------------------------------------|----------------------------------------------------------------------|-------------------------------------------------------------------------------------------------|---------------|-------------------------------------------------------------------------------------------------------------------------------------------------------------------------------------------------------------------------|--------------------------------|-------------------------------------------------------------------------------------------------------------------------------------------------------------------------------------------------------------------------------------------------------------------------|---------------------------|----------------------------------------------------------------------------------------------------------------------------------|-----|
| engagement in HIV care in a large US metropolitan health system (35).                                                                                          |                  |                                                                                                           | factor for adherence to the care process                             |                                                                                                 |               | Linkage to care if patient had a visit in each 6-month interval of the 24-month period following the index HIV test with the visit in each 6-month interval separated by $\geq 60$ days.<br><br>Virological suppression |                                | HIV individuals                                                                                                                                                                                                                                                         |                           | infection; HIV labs > 90 days before index HIV test                                                                              |     |
| <b>Levison 2017</b><br>"Where It Falls Apart": Barriers to Retention in HIV Care in Latino Immigrants and Migrants (36).                                       | United States    | Eligible participants needed to be born in Puerto Rico or other Latin American Spanish-speaking countries | Study of the factors of adherence to the care process among migrants | Puerto Rico<br>Dominican Republic<br>Honduras<br>Guatemala<br>Mexico<br>Colombia<br>El Salvador | Not specified | Retention in Care                                                                                                                                                                                                       | Qualitative study              | To understand psychosocial, cultural, and logistical processes involved in sustained attendance in HIV primary care in these populations                                                                                                                                | December 2013-April 2015  | -HIV infected status<br>-age $\geq 18$ years<br>-self-identified Latino<br>-providers                                            | 51  |
| <b>Logie 2017</b><br>Engagement in and continuity of HIV care among African and Caribbean Black women living with HIV in Ontario, Canada (37)                  | Canada           | Not specified                                                                                             | study of the factors of adherence to the care process among migrants | Africa;<br>Caribbean                                                                            | Not specified | Retention in care                                                                                                                                                                                                       | Cross-sectional, longitudinal) | (1) To adapt a comprehensive measure of engagement and continuity of care for PLWH<br>(2) To examine the associations between engagement in HIV care and quality of life (QOL) among African, Caribbean and Black (ACB), women living with HIV, WLWH in Ontario, Canada | June 2010<br>January 2011 | Being $\geq 18$ years old; self-identifying as a woman; HIV positive; identifying from the ACB race/ethnicity; living in Ontario | 173 |
| <b>MambetDoue 2016</b><br>The Role of Mediators in the Indirect Effects of Religiosity on Therapeutic Compliance in African Migrant HIV-Positive Patients (38) | Europe<br>France | Native of sub-Saharan Africa                                                                              | Study of the factors of adherence to the care process among migrants | Africa                                                                                          | Not specified | Retention in care                                                                                                                                                                                                       | Cross-sectional study          | To investigate the role of two mediators (magical-religious beliefs and non-use of toxic substances) in the interaction between religiosity (religious/spiritual beliefs and religious practice) and therapeutic compliance                                             | Not specified             | Native of sub-Saharan Africa; HIV-positive; monitored regularly in the study hospital                                            | 81  |
| <b>Masindi 2018</b>                                                                                                                                            | Canada           | Identified                                                                                                | Migrant                                                              | Africa;                                                                                         | Undocumen     | Retention in care                                                                                                                                                                                                       | Cohort study                   | To compare rates of health                                                                                                                                                                                                                                              | April                     | Adults in Ontario; aged                                                                                                          | 242 |

|                                                                                                                                                        |                   |                                                                                                                    |                                                                                                                                                      |                                        |               |                                                                                                                                                                                   |              |                                                                                                                                                                                                                                                                                                                            |                          |                                                                                                                                                                                                                                                                                                                                                               |       |
|--------------------------------------------------------------------------------------------------------------------------------------------------------|-------------------|--------------------------------------------------------------------------------------------------------------------|------------------------------------------------------------------------------------------------------------------------------------------------------|----------------------------------------|---------------|-----------------------------------------------------------------------------------------------------------------------------------------------------------------------------------|--------------|----------------------------------------------------------------------------------------------------------------------------------------------------------------------------------------------------------------------------------------------------------------------------------------------------------------------------|--------------------------|---------------------------------------------------------------------------------------------------------------------------------------------------------------------------------------------------------------------------------------------------------------------------------------------------------------------------------------------------------------|-------|
| Co-morbid Non-communicable Diseases and Associated Health Service Use in African and Caribbean Immigrants with HIV(39)                                 |                   | according to the Ontario portion of the federally maintained Immigration, Refugees and Citizenship Canada Database | status as a risk or protective factor for adherence to the care process<br><br>study of the factors of adherence to the care process among migrants, | Caribbean                              | ted           |                                                                                                                                                                                   |              | service use for non-communicable disease (NCDs) and overall health service use among African and Caribbean immigrants with HIV with those of HIV-negative individuals from these regions and non-immigrants with HIV.<br><br>Outcome:<br>rates of ambulatory care visits; hospital admissions; emergency department visits | 1, 2010 - March 31, 2013 | 18 years and over; alive and eligible for health insurance; African and Caribbean immigrants or HIV infected people                                                                                                                                                                                                                                           | 381   |
| <b>Milz 2016</b><br>Control beliefs and health locus of control in Ugandan, German and migrated sub-Saharan African HIV infected individuals (40)      | Europe<br>Germany | Not specified                                                                                                      | Study of the factors of adherence to the care process among migrants                                                                                 | Africa                                 | Not specified | Treatment adherence                                                                                                                                                               | Cohort study | To explore the differences in health locus of control and control beliefs between HIV infected patients from sub-Saharan Africa with and without lifetime experience of migration                                                                                                                                          | Not specified            | -HIV-infected patients from the internal medicine and neurological HIV clinic at the University Hospital of Munster and from Rubaga Hospital Kampala<br><br>Exclusion criteria:<br>cognitive impairment; African subjects with no English language skills                                                                                                     | 62    |
| <b>Monge 2013</b><br>Inequalities in HIV disease management and progression in migrants from Latin America and sub-Saharan Africa living in Spain (41) | Europe<br>Spain   | Not specified; for each individual, self-referred region of origin was recorded                                    | Migrant status as a risk or protective factor for adherence to the care process                                                                      | Africa; South America/ Central America | Not specified | Treatment adherence; Virological response<br>Patients who had not had any follow-up visit in the 1 year prior to administrative censoring were considered to be lost to follow-up | Cohort study | To investigate inequalities in the management and progression of HIV disease in Latin American and the Spanish-speaking Caribbean (LAC) and Sub-Saharan migrants (SSA) living in Spain compared with the native population                                                                                                 | 2004-2010                | HIV-infected patients who were ART naive at entry; originating from Spain, Latin America and Spanish-speaking Caribbean (LAC) or sub-Saharan Africa (SSA); at least one CD4 count of any value; VL measurement> 50 cp/ml in the 6 months prior to ART initiation; at least two post-ART determinations, one within the first year<br><br>Exclusion criterion: | 6 811 |

|                                                                                                                                                                                                       |                                           |                                                                                                                                                                      |                                                                                 |                                                                          |               |                                                                                                                                                                                         |                   |                                                                                                                                                                                                                                                        |                                     |                                                                                                                                                                                                           |        |
|-------------------------------------------------------------------------------------------------------------------------------------------------------------------------------------------------------|-------------------------------------------|----------------------------------------------------------------------------------------------------------------------------------------------------------------------|---------------------------------------------------------------------------------|--------------------------------------------------------------------------|---------------|-----------------------------------------------------------------------------------------------------------------------------------------------------------------------------------------|-------------------|--------------------------------------------------------------------------------------------------------------------------------------------------------------------------------------------------------------------------------------------------------|-------------------------------------|-----------------------------------------------------------------------------------------------------------------------------------------------------------------------------------------------------------|--------|
|                                                                                                                                                                                                       |                                           |                                                                                                                                                                      |                                                                                 |                                                                          |               |                                                                                                                                                                                         |                   |                                                                                                                                                                                                                                                        |                                     | patients without CD4 count                                                                                                                                                                                |        |
| <b>Myers 2016</b><br>Antiretroviral Therapy and Viral Suppression Among Foreign-Born HIV-Infected Persons Receiving Medical Care in the United States: A Complex Sample, Cross-Sectional Survey (42). | United States                             | Foreign born: if patient listed as coming from a country of territory of birth other than the United States or Puerto Rico                                           | Migrant status as a risk or protective factor for adherence to the care process | Africa; Southeast Asia; South America/ Central America; Caribbean; Other | Not specified | Virological response<br>Viral suppression defined as undetectable or <200 copies/mL for the most recent measure                                                                         | Cohort study      | To describe characteristics of foreign-born HIV-infected persons receiving medical care and to explore clinical outcomes of ART receipt an viral suppression achieved by foreign-born HIV-infected persons as compared with their US-born counterparts | June 2009<br>May 2012               | Data from Medical Monitoring Project from 2009-2012                                                                                                                                                       | 13 190 |
| <b>Ojikutu 2018</b><br>African born women living with HIV in the United States: unmet needs and opportunities for intervention (43)                                                                   | United States<br>Boston and New York City | African Born                                                                                                                                                         | Study of the factors of adherence to the care process among migrants            | Africa                                                                   | Not specified | Retention in care; Treatment adherence                                                                                                                                                  | Qualitative study | To explore the psychosocial and mental health challenges of African born women living with HIV two cities in the US                                                                                                                                    | Not specified                       | African Immigrant; second generation African Immigrant and /or with extensive experience working with African born individuals living with HIV<br>-aged 18 years and above<br>-French or English speaking | 45     |
| <b>Parisey 2019</b><br>HIV Infection in North African Patients (44)                                                                                                                                   | Europe<br>France                          | Patients considered from North Africa if they were born in Algeria, Morocco or Tunisia or if they had lived in one of these three countries for more than six months | Migrant status as a risk or protective factor for adherence to the care process | Africa                                                                   | Not specified | Loss to follow-up; Virological response<br>Loss to care: absence of consultation in study structure for more than 12 months.<br><br>Viral load not controlled in the previous 12 months | Cohort study      | To describe the demographic, clinical and immunological characteristics of North African HIV-infected patients                                                                                                                                         | 1st January 2015<br>31 January 2016 | ->18 years old; been diagnosed with HIV-1 infection; at least one outpatient visits between 1January 2015 and 31 January 2016                                                                             | 835    |
| <b>Pérez-Molina 2012</b><br>Response to combined antiretroviral therapy according                                                                                                                     | Europe<br>Spain                           | Not specified                                                                                                                                                        | Migrant status as a risk or protective factor for adherence to                  | Africa; South America/ Central America; Caribbean;                       | Not specified | Loss to follow-up; Retention in care; Virological response<br>Treatment failure: an increase in HIV-1                                                                                   | Cohort study      | To investigate differences in treatment response according to sex and geographic origin in an HIV-infected cohort comprising Spanish-born                                                                                                              | January 2005<br>December 2006       | HIV-infected patients from GES 5808 cohort; treatment started between January 2005 and December 2006; at least one follow-up                                                                              | 1090   |

|                                                                                                                                      |                        |                        |                                                                                 |                  |                             |                                                                                                                                                                                                                                                                                                                                                                                                                     |                            |                                                                                                                                                                              |                          |                                                                                                                                                                                                                                                                                     |      |
|--------------------------------------------------------------------------------------------------------------------------------------|------------------------|------------------------|---------------------------------------------------------------------------------|------------------|-----------------------------|---------------------------------------------------------------------------------------------------------------------------------------------------------------------------------------------------------------------------------------------------------------------------------------------------------------------------------------------------------------------------------------------------------------------|----------------------------|------------------------------------------------------------------------------------------------------------------------------------------------------------------------------|--------------------------|-------------------------------------------------------------------------------------------------------------------------------------------------------------------------------------------------------------------------------------------------------------------------------------|------|
| to gender and origin in a cohort of naive HIV-infected patients: GESIDA-5808 study (45)                                              |                        |                        | the care process                                                                | Other            |                             | RNA levels above the limit of quantitation ( LOQ) in two consecutive determinations during follow-up after an initial response; not reaching an HIV 1 RAN level< 50 copies/ml; no decrease in HIV 1 RNA level of 2 log10, at weeks 12-16, if no other visit was available; loss to follow up; new HIV-related opportunistic infection not due to immune reconstitution; death; switch or discontinuation of therapy |                            | and immigrant patients initiating antiretroviral therapy.<br><br>Outcome:<br>Time to treatment failure                                                                       |                          | visit                                                                                                                                                                                                                                                                               |      |
| <b>Poon 2013</b><br>Treatment outcomes in undocumented Hispanic immigrants with HIV infection (46)                                   | United States<br>Texas | Not specified          | Migrant status as a risk or protective factor for adherence to the care process | Not specified    | Documented and Undocumented | Virological response; Retention in care;                                                                                                                                                                                                                                                                                                                                                                            | Retrospective cohort study | To conduct a retrospective cohort study to compare the health outcomes of undocumented Hispanics and documented persons obtaining care in a large county HIC clinic in Texas | 1/1/2003<br>06/30/2008   | Patients presenting for care at Thomas Street Health Center<br>Exclusion criteria:<br>Receipt of antiretroviral therapy before entry to TSHC; Asian race; non-Hispanic Black or White race; No CD4 or HIV viral load complete; aged under 18 years 6) HIV viral load <400 copies/ml | 1620 |
| <b>Raho-Moussa 2019</b><br>Immunological and virological response to antiretroviral treatment in migrant and native men and women in | Europe<br>France       | Born outside of France | Migrant status as a risk or protective factor for adherence to the care process | Africa;<br>Other | Not specified               | Virological response<br>Virological non-suppression: plasma viral load (VL)>50 copies/ml                                                                                                                                                                                                                                                                                                                            | Cross-sectional study      | To assess association between migration, socioeconomic status and virological suppression in PLHIV on ART in two hospitals located in Paris area                             | 01/05/2013<br>31/10/2014 | HIV infected adults;18 years; treated with ART for at least six months; attended outpatient clinic for one-day annual medical evaluation in two French university clinical center I                                                                                                 | 475  |



|                                                                                                                                                                                  |               |                                                                                     |                                                                       |                                                          |                          |                                                                                                                                                                                                                                                                                                                                                                                                                                                                                                                                                                          |                       |                                                                                                                                                                                                                                                                                                                                                                                                                 |                             |                                                                                                   |     |
|----------------------------------------------------------------------------------------------------------------------------------------------------------------------------------|---------------|-------------------------------------------------------------------------------------|-----------------------------------------------------------------------|----------------------------------------------------------|--------------------------|--------------------------------------------------------------------------------------------------------------------------------------------------------------------------------------------------------------------------------------------------------------------------------------------------------------------------------------------------------------------------------------------------------------------------------------------------------------------------------------------------------------------------------------------------------------------------|-----------------------|-----------------------------------------------------------------------------------------------------------------------------------------------------------------------------------------------------------------------------------------------------------------------------------------------------------------------------------------------------------------------------------------------------------------|-----------------------------|---------------------------------------------------------------------------------------------------|-----|
| Western Europe; is benefit equal for all? (47)                                                                                                                                   |               |                                                                                     |                                                                       |                                                          |                          |                                                                                                                                                                                                                                                                                                                                                                                                                                                                                                                                                                          |                       |                                                                                                                                                                                                                                                                                                                                                                                                                 |                             |                                                                                                   |     |
| <b>Remien 2015</b><br>Barriers and facilitators to engagement of vulnerable populations in HIV primary care in New York City (48)                                                | United States | Immigrant                                                                           | Among migrants, study of the factors of adherence to the care process | Africa; Other                                            | Not specified            | Retention in care; Treatment adherence HIV care engagement                                                                                                                                                                                                                                                                                                                                                                                                                                                                                                               | Qualitative study     | To explore structural, social and individual barriers to and facilitators of engagement in HIV care among HIV-positive African immigrants, previously incarcerated adults, young men who have sex with men (YSMSM) and transgender women (TGW)                                                                                                                                                                  | Not specified               | HIV positive; 3 months post-HIV diagnosis; 18 years of age; linked to care                        | 80  |
| <b>Ridolfo 2017</b><br>Effect of Legal Status on the Early Treatment Outcomes of Migrants Beginning Combined Antiretroviral Therapy at an Outpatient Clinic in Milan, Italy (49) | Europe Italy  | People not born in Italy (region of origin was derived from their country of birth) | Study of the factors of adherence to the care process among migrants  | Africa; South America/ Central America; Caribbean; other | Documented; Undocumented | Lost to follow-up; Retention in care; Virological response<br><br>Retention in follow-up was based on the availability of clinical and laboratory data at the selected time point +/-90 days.<br><br>The patients for whom such data were not available and were not known to have died or moved elsewhere were considered as not retained in care.<br><br>Lost to follow-up: patients for whom such data were not available and were not known to have died or moved elsewhere.<br><br>Virological suppression was defined as an undetectable HIV viral load (i.e., <50 | Cross-sectional study | To describe the demographic and clinico-epidemiological characteristics of a population of undocumented migrants with HIV infection starting antiretroviral treatment at an Italian outpatient clinic and compare their early treatment outcomes with those of documented migrants and Italian natives.<br><br>Outcome: Retention in care and virological suppression status at 12 months after cART initiation | 1 January 2001 to June 2013 | Migrants; HIV infected; who started cART at our clinic between January 1, 2001 and June 30, 2013. | 885 |

|                                                                                                                                                                                                                                                |                           |                                                                                                                                                                                                                                                                                       |                                                                                 |                                                           |                          | copies/mL after 12 months +/- 90 days)                                                                                                                                                                                                                                                                           |                       |                                                                                                                                                                                                                                                                                                                                |                                    |                                                                                                                                            |      |
|------------------------------------------------------------------------------------------------------------------------------------------------------------------------------------------------------------------------------------------------|---------------------------|---------------------------------------------------------------------------------------------------------------------------------------------------------------------------------------------------------------------------------------------------------------------------------------|---------------------------------------------------------------------------------|-----------------------------------------------------------|--------------------------|------------------------------------------------------------------------------------------------------------------------------------------------------------------------------------------------------------------------------------------------------------------------------------------------------------------|-----------------------|--------------------------------------------------------------------------------------------------------------------------------------------------------------------------------------------------------------------------------------------------------------------------------------------------------------------------------|------------------------------------|--------------------------------------------------------------------------------------------------------------------------------------------|------|
| <b>Ross 2017</b><br>Outcomes Along the HIV Care Continuum Among Undocumented Immigrants in Clinical Care (50)                                                                                                                                  | United States<br>New York | Undocumented patients=<br>*patient had a missing Social Security Number (SSN) or invalid SSN in the electronic medical record (EMR)<br>* insurance check returned a no insurance status result, Uninsured (i.e., self-pay), Emergency Medicaid or AIDS Drug Assistance Program (ADAP) | Study of the factors of adherence to the care process among migrants            | Africa; South America/ Central America; Caribbean; others | Documented; Undocumented | Lost to follow-up; Retention in care; Virological response Retained in care: $\geq 2$ HIV-related lab tests (CD4 count or viral load) $\geq 90$ days apart during each calendar year<br><br>Viral suppression : HIV RNA measurement $> 200$ copies/ml for the last measured viral load during each calendar year | Cross sectional study | To compare rates of retention in care, receipt of ART and viral suppression between undocumented immigrants and documented individuals in a large, diverse clinical population of HIV-infected patients in a setting with high HIV prevalence and a substantial number of undocumented immigrants                              | 1 January 2006<br>31 December 2014 | All HIV infected persons at least 18 years old; who had at least one outpatient visit at MMC between January 1, 2006 and December 31, 2014 | 7551 |
| <b>Roux 2018</b><br>Posttraumatic Stress Disorder as a Significant Correlate of Voluntary Antiretroviral Treatment Interruption in Adult HIV-Infected Patients Followed up in French Hospitals: Data From the ANRS-VESPA2 National Survey (51) | Europe<br>France          | -Based on country of origin                                                                                                                                                                                                                                                           | Migrant status as a risk or protective factor for adherence to the care process | Africa; Other                                             | Not specified            | Treatment adherence<br>Voluntary treatment interruption was defined as reporting to have voluntarily interrupted ART at least once during the previous month.                                                                                                                                                    | Cross-sectional study | To evaluate the association between post-traumatic stress disorder (PTSD) and voluntary treatment interruption (VTI) after adjusting for significant sociodemographic, behavioral, clinical, and psychosocial correlates of VTI, in a nationally representative survey of HIV-infected adults followed up in French hospitals. | April 2011<br>January 2012         | Patients from the ANRS-VESPA 2 survey; HIV-infected patients followed up in French hospitals                                               | 2768 |
| <b>Saracino 2014</b><br>Late presentation                                                                                                                                                                                                      | Europe<br>Italy           | Immigrants were defined                                                                                                                                                                                                                                                               | Migrant status as a                                                             | Not specified                                             | Not specified            | Lost to follow-up; Virological response                                                                                                                                                                                                                                                                          | Cross-sectional study | -To verify if opportunities for diagnosis, clinical                                                                                                                                                                                                                                                                            | 1 January                          | All inpatients and outpatients attending                                                                                                   | 716  |

|                                                                                                                                                                              |                 |                                                                                                                                                                                                        |                                                                                                                                                              |                                                                          |               |                                                                                                       |              |                                                                                                                                                                                                                                                                                                                                                                                                                                                                                                                                          |                                      |                                                                                                                                   |      |
|------------------------------------------------------------------------------------------------------------------------------------------------------------------------------|-----------------|--------------------------------------------------------------------------------------------------------------------------------------------------------------------------------------------------------|--------------------------------------------------------------------------------------------------------------------------------------------------------------|--------------------------------------------------------------------------|---------------|-------------------------------------------------------------------------------------------------------|--------------|------------------------------------------------------------------------------------------------------------------------------------------------------------------------------------------------------------------------------------------------------------------------------------------------------------------------------------------------------------------------------------------------------------------------------------------------------------------------------------------------------------------------------------------|--------------------------------------|-----------------------------------------------------------------------------------------------------------------------------------|------|
| and Lost to follow-up of immigrants newly diagnosed with HIV in the HAART era (52)                                                                                           |                 | as foreign-born individuals from non-European countries; however, patients from recently included European Union countries or those applying for membership were also included in the immigrant group. | risk or protective factor for adherence to the care process<br><br>And<br><br>Study of the factors of adherence to the care process among migrants           |                                                                          |               | Plasma viral load (pVL) mean decrease (log copies /mL) at 1, 3 and 6 months from treatment initiation |              | management and response to antiretroviral therapy differed between HIV-infected foreigners and natives by analyzing routine practices at an Italian Infectious Disease Clinic in the period from 2006-2010                                                                                                                                                                                                                                                                                                                               | y 1996<br>31<br>Decem<br>ber<br>2010 | the study's Infectious Disease Clinic between January 1, 1996 and December 31, 2010 with an initial HIV diagnosis.                |      |
| <b>Saracino 2016</b> , Increased risk of virologic failure to the first antiretroviral regimen in HIV-infected migrants compared to natives: data from the ICONA cohort (53) | Europe<br>Italy | Migrants were defined as those born outside Italy, based on their geographical origin ( derived from nationality or from country of birth or origin.)                                                  | Migrant status as a risk or protective factor for adherence to the care process;<br><br>Study of the factors of adherence to the care process among migrants | Africa;<br>Southeast Asia; South America/ Central America; Not specified | Not specified | Virological response<br>Time to failure after at least six months of ART                              | Cohort study | To evaluate possible disparities in access and/or risk of virological failure to first line ART regimens in migrants compared to Italian-born patients enrolled in the ICONA cohort, and to assess determinants of virological failure among migrants living with HIV<br><br>Outcomes:<br>*Time to virological failure (VF) after at least six months of therapy, defined as the first of two consecutive VL > 200 copies/ml<br><br>*Treatment discontinuation for any reason<br><br>*Treatment failure: confirmed VL of > 200 copies/mL | Januar<br>y 2004<br>-March<br>2014   | -Patients from the ICONA Foundation Study<br>-all native and migrant treatment naive patients<br>-from January 2004 to March 2014 | 5773 |

|                                                                                                                                                                                                     |                             |                                                                                                             |                                                                                 |                                   |               |                                                                                                                                                                                                                                                                                                                                                                                                                                                                                                |                       |                                                                                                                                                                   |                           |                                                                                                                                                                                                            |                               |
|-----------------------------------------------------------------------------------------------------------------------------------------------------------------------------------------------------|-----------------------------|-------------------------------------------------------------------------------------------------------------|---------------------------------------------------------------------------------|-----------------------------------|---------------|------------------------------------------------------------------------------------------------------------------------------------------------------------------------------------------------------------------------------------------------------------------------------------------------------------------------------------------------------------------------------------------------------------------------------------------------------------------------------------------------|-----------------------|-------------------------------------------------------------------------------------------------------------------------------------------------------------------|---------------------------|------------------------------------------------------------------------------------------------------------------------------------------------------------------------------------------------------------|-------------------------------|
| <b>Sauceda 2019</b><br>From Theory to Application: A Description of Transnationalism in Culturally-Appropriate HIV Interventions of Outreach, Access, and Retention Among Latino/a Populations (54) | United States<br>California | Not specified                                                                                               | Study of the factors of adherence to the care process among migrants            | South America/<br>Central America | Not specified | Retention in care                                                                                                                                                                                                                                                                                                                                                                                                                                                                              | Qualitative study     | To describes a 5-year, multisite transnational initiative to address the aforementioned challenges to reducing HIV health disparities                             | 2013<br>2018              | -Latinos<br>- newly diagnosed HIV positive<br>- left care during the study period                                                                                                                          | 10<br>demonstrations<br>sites |
| <b>Servin 2012</b><br>Choosing sides: HIV health care practices among shared populations of HIV-positive Latinos living near the US-Mexico border (55)                                              | United States<br>California | Mexican origin or other Latin American origin, residing in San Diego for at least 1 month in the prior year | Migrant status as a risk or protective factor for adherence to the care process | South America/<br>Central America | Not specified | Treatment adherence<br>HIV health care-seeking practices:<br>Unsupervised changes to ART treatment                                                                                                                                                                                                                                                                                                                                                                                             | Cross-sectional study | To compare HIV health care utilization practices and patterns among HIV-positive Latinos receiving HIV care in San Diego with those receiving HIV care in Tijuana | July 2009<br>January 2010 | - HIV positive<br>-Mexican origin or other Latin America origin<br>-at least 18 years old<br>-residing in Tijuana or San Diego for at least 1 month in the prior year and able to speak Spanish or English | 233                           |
| <b>Sheehan 2017</b><br>Black-White and Country of Birth Disparities in Retention in HIV Care and Viral Suppression among Latinos with HIV in Florida, 2015 (56)                                     | United States<br>Florida    | Reported as Latino or Hispanic the Florida Department of Health HIV reporting system ; Country of birth     | Migrant status as a risk or protective factor for adherence to the care process | South America/<br>Central America | Not specified | Retention in care;<br>Virological response<br>Retention in care during 2015 : evidence of engagement in care two or more times, at least three months apart, during 2015<br>Engagement in care : evidence of at least one laboratory test, a prescription fill through the AIDS Drug Assistance Program (ADAP) or a physician visit documented in one of the Ryan White databases.<br>HIV viral load suppression during 2015 was defined ( and calculated by the FDOH) as having evidence of a | Cohort study          | To identify potential disparities by race and by country of birth in retention in HIV care an HIV viral load suppression among Latinos with HIV                   | 2000-2014                 | Meeting CDC guideline criteria for HIV; identified as Latino or Hispanic; aged ≥13 years                                                                                                                   | 12106                         |

|                                                                                                                                                                                                          |                                               |                                                                                          |                                                                                 |                                   |               |                                                                                                                                                                                                                                                 |                                    |                                                                                                                                                                                                                                                                                                                |                               |                                                                                                                                                                                            |      |
|----------------------------------------------------------------------------------------------------------------------------------------------------------------------------------------------------------|-----------------------------------------------|------------------------------------------------------------------------------------------|---------------------------------------------------------------------------------|-----------------------------------|---------------|-------------------------------------------------------------------------------------------------------------------------------------------------------------------------------------------------------------------------------------------------|------------------------------------|----------------------------------------------------------------------------------------------------------------------------------------------------------------------------------------------------------------------------------------------------------------------------------------------------------------|-------------------------------|--------------------------------------------------------------------------------------------------------------------------------------------------------------------------------------------|------|
|                                                                                                                                                                                                          |                                               |                                                                                          |                                                                                 |                                   |               | viral load < 200 copies/mL in the most recent laboratory test                                                                                                                                                                                   |                                    |                                                                                                                                                                                                                                                                                                                |                               |                                                                                                                                                                                            |      |
| <b>Sheehan 2018</b><br>Role of Country of Birth, Testing Site, and Neighborhood Characteristics on Non-linkage to HIV Care Among Latinos (57)                                                            | United States<br>Florida                      | -Patients reported as Hispanic or Latino ethnicity from the Florida Department of health | Study of the factors of adherence to the care process among migrants            | South America/<br>Central America | Not specified | Retention in care<br>Linkage to HIV care was defined as a laboratory test (HIV viral load or CD4) within three months of HIV diagnosis                                                                                                          | Cohort on mandatory reporting data | To estimate disparities in linkage to human immunodeficiency virus (HIV) care among Latinos by country/region of birth, HIV testing site and neighborhood characteristics<br><br>Outcome:<br>Linkage to HIV care was defined as a laboratory test (HIV viral load or CD4) within three months of HIV diagnosis | 2014<br>2015                  | Latino individuals; Diagnosed during 2014 or 2015; Aged 13 or older                                                                                                                        | 2659 |
| <b>Sumari-de Boer 2012</b><br>HIV stigma and depressive symptoms are related to adherence and virological response to antiretroviral treatment among immigrant and indigenous HIV infected patients (58) | Europe<br>Netherlands                         | -Country of birth outside the Netherlands                                                | Migrant status as a risk or protective factor for adherence to the care process | Not specified                     | Not specified | Treatment adherence;<br>Virological response<br>Adherence for each drug: leftover medication of former refills + collected medication at refill/prescribed medication per day/number of days between refills.<br>Non-adherence: <100% adherence | Cohort study                       | To compare adherence to cART and virological treatment response and various psychosocial risk factors for non-adherence between native and immigrant HIV-infected patients in the Netherlands.                                                                                                                 | January 2008 - June 2009      | Adults non-pregnant; started cART after 1997; on cART for at least 6 months; sufficient fluency in Dutch of English to participate in a face-to-face interview.                            | 201  |
| <b>Tariq 2016</b><br>Lost to follow-up After Pregnancy Among Sub-Saharan Africa-Born Women Living With Human Immunodeficiency Virus in England, Wales and Northern Ireland: Results From a Large         | Europe<br>England, Wales and Northern Ireland | Born outside United Kingdom, in Sub-Saharan Africa                                       | Migrant status as a risk or protective factor for adherence to the care process | Africa                            | Not specified | Lost to follow-up<br>Lost to follow-up: no documented attendance for HIV care at an NHS clinic in EW&NI during the calendar year after confirmed or estimated end of pregnancy                                                                  | Cross-sectional study              | To examine the association between LTFU from HIV care in the calendar year after pregnancy and maternal ethnicity region of birth and maternal duration of residence in the United Kingdom                                                                                                                     | January 2000<br>December 2009 | Pregnant women infected by HIV; Born in SSA; white UK born women; included in two cohorts: National Study of HIV in Pregnancy (NSPC) and Survey of Prevalent Infections Diagnosed (SOPHID) | 5930 |

|                                                                                                                                                                                   |                     |                                                                       |                                                                                 |                                                                   |               |                                                                                                                                                                                                                                                                   |                       |                                                                                                                                                         |                                         |                                                                                                                                                                                                      |        |
|-----------------------------------------------------------------------------------------------------------------------------------------------------------------------------------|---------------------|-----------------------------------------------------------------------|---------------------------------------------------------------------------------|-------------------------------------------------------------------|---------------|-------------------------------------------------------------------------------------------------------------------------------------------------------------------------------------------------------------------------------------------------------------------|-----------------------|---------------------------------------------------------------------------------------------------------------------------------------------------------|-----------------------------------------|------------------------------------------------------------------------------------------------------------------------------------------------------------------------------------------------------|--------|
| National Cohort (59)                                                                                                                                                              |                     |                                                                       |                                                                                 |                                                                   |               |                                                                                                                                                                                                                                                                   |                       |                                                                                                                                                         |                                         |                                                                                                                                                                                                      |        |
| <b>Taylor 2014</b><br>Patterns of geographic mobility predict barriers to engagement in HIV care and antiretroviral treatment adherence (60)                                      | United States Texas | Self-identified as Dominican                                          | Study of the factors of adherence to the care process among migrants            | Caribbean                                                         | Not specified | Treatment adherence                                                                                                                                                                                                                                               | Qualitative study     | To determine how mobility impacts two HIV care outcomes , specifically, engagement in HIV care and adherence to antiretroviral therapy                  | 2010<br>2012                            | HIV-positive at least 21 years of age self-identifying as Dominican ; all participants had received ART continuously for six months and had $\geq 1$ travel event within the previous six months.    | 36     |
| <b>Teira 2019</b><br>Losses to follow-up of HIV-infected people in the Spanish VACH cohort over the period between 2013 and 2014: The importance of sociodemographic factors (61) | Europe Spain        | Not specified                                                         | Migrant status as a risk or protective factor for adherence to the care process | Not specified                                                     | Not specified | Lost to follow-up<br>Lost to follow-up: The frequency of consultation visits recommended in the clinical practice guidelines, consensus among project investigators with extensive experience in the field of care for HIV infection and the available experience | Cross-sectional study | To estimate the proportion of losses to follow-up and identify the main socio-demographic variables related to patients in the Spanish VACH cohort      | January 2012-December 2012              | HIV-infected people from the VACH cohort (All HIV-positive patients who came to 14 sites in Spain for their first outpatient visit from January 1997 to 31 December 2000 were included in the study) | 14 723 |
| <b>Thierfelder 2012</b><br>Participation, characteristics and retention rates of HIV-positive immigrants in the Swiss HIV Cohort Study (62)                                       | Europe Switzerland  | Geographical origin different from North-western countries and Europe | Migrant status as a risk or protective factor for adherence to the care process | Africa; Southeast Asia; South America/ Central America; Caribbean | Not specified | Lost to follow-up<br>Lost to follow-up: no further cohort visit during at least 1 year after the last visit.                                                                                                                                                      | Cohort study          | To study the demographic and clinical characteristics, the time trends and the retention rates of cohort participants of different geographical origins | 1 January 1996<br>31 December 2008      | HIV-infected patient from the Swiss Cohort Study (SHCS)                                                                                                                                              | 7480   |
| <b>Thomadakis, 2024</b><br>HCV Cascade of care in HIV/HCV Co-Infected Individuals: Missed Opportunities for Micro-Elimination (63)                                                | Europe Greece       | Not specified<br>Migration background                                 | Migrant status as a risk or protective factor for adherence to the care process | Not specified                                                     | Not specified | Lost to follow-up                                                                                                                                                                                                                                                 | Cohort study          | To construct the CoC of HIV/HCV co-infected individuals and to identify potential areas of improvement in Greece                                        | 28 January 2020<br><br>31 December 2023 | People with HIV who tested positive for HCV according to anti-HCV tests                                                                                                                              | 1213   |
| <b>Tilley 2015</b><br>Treatment and                                                                                                                                               | Australia           | -defined by country of                                                | Migrant status as a                                                             | Africa; Southeast                                                 | Not specified | Lost to follow-up; Virological response                                                                                                                                                                                                                           | Cohort study          | To describe the demographics and clinical                                                                                                               | 1999<br>2013                            | All participants enrolled in AHOD between 1999                                                                                                                                                       | 1173   |

|                                                                                                                                                                            |                |                                                                                                                                                 |                                                                                 |                                                               |               |                                                                                                                                                                                                                                                                                                                                                                                 |                                                                     |                                                                                                                                                                                                                   |                                   |                                                                                                                                                                                                                             |      |
|----------------------------------------------------------------------------------------------------------------------------------------------------------------------------|----------------|-------------------------------------------------------------------------------------------------------------------------------------------------|---------------------------------------------------------------------------------|---------------------------------------------------------------|---------------|---------------------------------------------------------------------------------------------------------------------------------------------------------------------------------------------------------------------------------------------------------------------------------------------------------------------------------------------------------------------------------|---------------------------------------------------------------------|-------------------------------------------------------------------------------------------------------------------------------------------------------------------------------------------------------------------|-----------------------------------|-----------------------------------------------------------------------------------------------------------------------------------------------------------------------------------------------------------------------------|------|
| disease outcomes of migrants from low- and middle-income countries in the Australian HIV Observational Database cohort (64)                                                |                | birth (COB). Country of birth was categorized into country-specific income groupings based on World Bank gross national income (GNI) indicators | risk or protective factor for adherence to the care process                     | Asia; South America/ Central America; Caribbean               |               | Lost to follow-up: patient had not been seen at the clinic for at least one year. First viral suppression= HIV RNA viral load<400 copies/mL.                                                                                                                                                                                                                                    |                                                                     | characteristics of participants in the Australian HIV Observational Database (AHOD) cohort born in low and middle-income countries (compared with participants born in Australia (and other high-income countries |                                   | and 2013 who attended a clinical site that routinely collected country of birth (COB) information                                                                                                                           |      |
| <b>Torrecilla García 2016</b><br>Clinical, epidemiological and treatment failure data among HIV-1 non-B-infected patients in the Spanish AIDS Research Network Cohort (65) | Europe Spain   | Country of origin different from Spain                                                                                                          | Migrant status as a risk or protective factor for adherence to the care process | Africa; Southeast Asia; South America/ Central America; Other | Not specified | Lost to follow-up; Virological response Treatment failure: patients with detectable plasmatic VL higher than 50 HIV-1-RNA copies/ML after 24 weeks of ARV exposure in at least two consecutive viraemia quantifications within three months. Lost to follow-up : subjects without available data during the previous year of follow-up for whom there was no evidence of death. | Cohort study                                                        | To analyze the clinical and epidemiological features in HIV-1 non-B- infected patients enrolled in the Cor RIS cohort from 2004 to 2008                                                                           | From January 2004 To October 2008 | Patients from the CoRIS cohort; Subjects over 13 years old visited in 31 hospitals and one HIV diagnosis center located throughout Spain since January 2004; HIV-1 non B variants with available pol sequence at enrollment | 82   |
| <b>VanBeckhoven 2015</b><br>Good continuum of HIV care in Belgium despite weaknesses in retention and linkage to care among migrants (66)                                  | Europe Belgium | Nationality different from Belgian Nationality                                                                                                  | Migrant status as a risk or protective factor for adherence to the care process | Africa; Other                                                 | Not specified | Retention in care; Virological response Linkage to HIV care: having at least one viral load (VL) or CD4 count recorded within 1 year of HIV diagnosis with a window of 7 days for VL records to prevent incorrectly counting VL measurements performed at the                                                                                                                   | Descriptive epidemiological studies (cross-sectional, longitudinal) | To estimate the proportion in each stage of the continuum of HIV care in Belgium among diagnosed PLHIV and analyzed factors associated with attrition at each respective stage                                    | 2007-2011                         | HIV patients from the national registry of new HIV diagnoses records and the Belgian HIV cohort study                                                                                                                       | 4117 |

|                                                                                                                                                 |                               |                                                                                          |                                                                                 |                           |               |                                                                                                                                                                                                                                                                                                   |                   |                                                                                                                                                                                                                                                                             |                           |                                                                                                                                                                                                                                                                              |                |
|-------------------------------------------------------------------------------------------------------------------------------------------------|-------------------------------|------------------------------------------------------------------------------------------|---------------------------------------------------------------------------------|---------------------------|---------------|---------------------------------------------------------------------------------------------------------------------------------------------------------------------------------------------------------------------------------------------------------------------------------------------------|-------------------|-----------------------------------------------------------------------------------------------------------------------------------------------------------------------------------------------------------------------------------------------------------------------------|---------------------------|------------------------------------------------------------------------------------------------------------------------------------------------------------------------------------------------------------------------------------------------------------------------------|----------------|
|                                                                                                                                                 |                               |                                                                                          |                                                                                 |                           |               | time of diagnosis as initial HIV care visit.<br>Retention in care: the proportion of patients in care in 2010, those having one CD4 or VL measurement during that year, who had at least one record of CD4 or VL in 2011. Suppressed viral load was defined as the last measured VL<50 copies/mL. |                   |                                                                                                                                                                                                                                                                             |                           |                                                                                                                                                                                                                                                                              |                |
| <b>Vignier 2018</b><br>Refusal to provide healthcare to sub-Saharan migrants in France: a comparison according to their HIV and HBV status (67) | Europe<br>France              | Migrants born in sub-Saharan Africa                                                      | Study of the factors of adherence to the care process among migrants            | Africa                    | Not specified | Retention in care                                                                                                                                                                                                                                                                                 | Cohort study      | To assess the frequency of reported healthcare refusal and to study its determinants according to HIV and CHB status and social situation                                                                                                                                   | February 2012<br>May 2013 | Born in sub-Saharan Africa; aged 18-59; diagnosed at least three months prior to inclusion for the HIV and CHB groups and for the reference group, if the latter were not diagnosed with either HIV or HBV.<br><br>Exclusion criteria: major cognitive or health impairments | 2459           |
| <b>Winston 2013</b><br>Evaluation of longitudinal clinical outcomes and adherence to care among HIV-infected refugees (68)                      | United States<br>Rhode Island | Refugees or asylees according to the United Nations High Commission for Refugees (UNHCR) | Migrant status as a risk or protective factor for adherence to the care process | Africa                    | Not specified | Retention in care; Virological response<br>Number of appointments scheduled per year, number of appointments kept per year, proportion of scheduled appointments kept per year as a minimum clinical standard of appointments                                                                     | Cohort study      | To identify differences in the long-term outcomes of viral load (VL) suppression and immune restoration between refugees and non-refugees, and to identify the contributing factors that highlight potential targets for interventions to improve care for this population. | 2000<br>2008              | HIV 1 infected persons from sub-Saharan Africa classified as refugees or asylees according to the UNHCR who established care at the Miriam Hospital immunology center between 2000 and 2008                                                                                  | 153            |
| <b>Zamudio-Haas 2019</b><br>"No Estas Solo":                                                                                                    | United States<br>California   | Not specified                                                                            | Study of the factors of adherence to                                            | South America/<br>Central | Not specified | Retention in care                                                                                                                                                                                                                                                                                 | Qualitative study | To explore how interventions applied a transnational framework and                                                                                                                                                                                                          | October 2015              | -Mexicans or Puerto Ricans, using a transnational framework                                                                                                                                                                                                                  | 48 clients and |



|                                                                                                                      |  |  |                                 |         |  |  |  |                                                                                                         |           |  |                           |
|----------------------------------------------------------------------------------------------------------------------|--|--|---------------------------------|---------|--|--|--|---------------------------------------------------------------------------------------------------------|-----------|--|---------------------------|
| Navigation Programs Support Engagement in HIV Care for Mexicans and Puerto Ricans Living in the Continental U.S (69) |  |  | the care process among migrants | America |  |  |  | incorporated Latino cultural constructs into programs designed to promote linkage and retention in care | July 2016 |  | 27 intervention providers |
|----------------------------------------------------------------------------------------------------------------------|--|--|---------------------------------|---------|--|--|--|---------------------------------------------------------------------------------------------------------|-----------|--|---------------------------|

**Abbreviations:** ADAP AIDS Drug Assistance ;ART antiretroviral treatment ; cART combined AntiRetroviral Treatment ; CBA Canadian born aboriginal ; CBNA Canadian born non-aboriginal ; CDC Centers for Disease Control and Prevention ; COB country of birth ; DOT Directly observed therapy ; FHDH French Hospital Database on HIV ; HADS Hospital Anxiety Depression Scale ; LCA latent class analysis ; MCI Medical Care interruption ; NAME North Africa and Middle East ; OPC Outpatient Clinic ; PTSD post-traumatic stress disorder ; pVL plasma viral load ; LCA latent class analysis ; SHCS Swiss HIV Cohort; SSA sub-Saharan Africa; TGW transgender women; UNHCR United Nations High Commission for Refugees ; VTI voluntary treatment interruption ; WEWC Western Europe and Western Countries ; YSMMS young men who have sex with men EE Eastern Europe

References

1. Abgrall S, Fugon L, Lélé N, Carde E, Bentata M, Patey O, et al. Visiting one’s native country: the risks of nonadherence in HIV-infected sub-Saharan migrants--ANRS VIHVO study. *J Int Assoc Provid AIDS Care*. déc 2013;12(6):407-13.

2. Abgrall S, Fugon L, Lélé N, Carde E, Bentata M, Patey O, et al. Risk factors for adherence failure in HIV-infected sub-Saharan migrants living in France and travelling back to their native country. *Int J STD AIDS* [Internet]. 1 avr 2014 [cité 12 oct 2017];25(5):389-90. Disponible sur: <https://doi.org/10.1177/0956462413506894>

3. Arnold EA, Fuller SM, Martinez O, Lechuga J, Steward WT. Documenting best practices for maintaining access to HIV prevention, care and treatment in an era of shifting immigration policy and discourse. *PloS One*. 2020;15(2):e0229291.

4. Arora AK, Vicente S, Engler K, Lessard D, Huerta E, Ishak J, et al. Patient-reported outcomes and experiences of migrants enrolled in a multidisciplinary HIV clinic with rapid, free, and onsite treatment dispensation: the « ASAP » study. *AIDS Res Ther*. 18 juin 2024;21(1):40.

5. Arrey AE, Bilsen J, Lacor P, Deschepper R. PERCEPTIONS OF STIGMA AND DISCRIMINATION IN HEALTH CARE SETTINGS TOWARDS SUB-SAHARAN AFRICAN MIGRANT WOMEN LIVING WITH HIV/AIDS IN BELGIUM: A QUALITATIVE STUDY. *J Biosoc Sci*. sept 2017;49(5):578-96.

6. Been SK, van de Vijver DAMC, Nieuwkerk PT, Brito I, Stutterheim SE, Bos AER, et al. Risk Factors for Non-Adherence to cART in Immigrants with HIV Living in the Netherlands: Results from the ROTterdam ADherence (ROAD) Project. *PloS One*. 2016;11(10):e0162800.

7. Been SK, Yildiz E, Nieuwkerk PT, Pogány K, van de Vijver DAMC, Verbon A. Self-reported adherence and pharmacy refill adherence are both predictive for an undetectable viral load among HIV-infected migrants receiving cART. *PloS One*. 2017;12(11):e0186912.

8. Been SK, Schadé A, Bassant N, Kastelijns M, Pogány K, Verbon A. Anxiety, depression and treatment adherence among HIV-infected migrants. *AIDS Care*. août 2019;31(8):979-87.

9. Been SK, van de Vijver DAMC, Smit J, Bassant N, Pogány K, Stutterheim SE, et al. Feasibility of Four Interventions to Improve Treatment Adherence

in Migrants Living with HIV in The Netherlands. *Diagn Basel*. 2020;10(11).

10. Borchmann O, Omland LH, Gerstoft J, Larsen CS, Johansen IS, Lunding S, et al. Length of stay in Denmark before HIV diagnosis and linkage to care: a population-based study of migrants living with HIV, Denmark, 1995 to 2020. *Euro Surveill Bull Eur Sur Mal Transm Eur Commun Dis Bull*. juill 2022;27(30):2100809.

11. Castelan A, Nellen JF, van der Valk M, Nieuwkerk PT. Intentional- but not Unintentional Medication Non-adherence was Related with Beliefs about Medicines Among a Multi-Ethnic Sample of People with HIV. *AIDS Behav*. avr 2023;27(4):1045-54.

12. Migrant Health Working Group for the Collaboration of Observational HIV Epidemiological Research in Europe (COHERE) in EuroCoord. Immunological and virological response to antiretroviral treatment in migrant and native men and women in Western Europe; is benefit equal for all? *HIV Med*. janv 2018;19(1):42-8.

13. Cyrus E, Dawson C, Fennie KP, Sheehan DM, Mauck DE, Sanchez M, et al. Disparity in Retention in Care and Viral Suppression for Black Caribbean-Born Immigrants Living with HIV in Florida. *Int J Environ Res Public Health*. 9 mars 2017;14(3):E285.

14. Dang BN, Giordano TP, Kim JH. Sociocultural and structural barriers to care among undocumented Latino immigrants with HIV infection. *J Immigr Minor Health*. févr 2012;14(1):124-31.

15. Demeke HB, Johnson AS, Zhu H, Gant Z, Duffus WA, Dean HD. HIV Infection-Related Care Outcomes among U.S.-Born and Non-U.S.-Born Blacks with Diagnosed HIV in 40 U.S. Areas: The National HIV Surveillance System, 2016. *Int J Environ Res Public Health*. 30 oct 2018;15(11):E2404.

16. Demeke HB, Luo Q, Beer L, Weiser J. Antiretroviral prescription, retention in care and viral suppression by place of birth among adults with diagnosed HIV in the United States-2015-2017, medical monitoring project. *AIDS Care*. janv 2021;33(1):86-91.

17. de Monteynard LA, Dray-Spira R, de Truchis P, Grabar S, Launay O, Meynard JL, et al. Later cART initiation in migrant men from sub-Saharan Africa without advanced HIV disease in France. *PloS One*. 2015;10(3):e0118492.

18. de Monteynard LA, Matheron S, Gilquin J, Pavie J, de Truchis P, Grabar S, et al. Influence of geographic origin, sex, and HIV transmission group on the outcome of first-line combined antiretroviral therapy in France. *AIDS Lond Engl*. 10 sept 2016;30(14):2235-46.

19. Elbirt D, Asher I, Mahlev-Guri K, Bezalel-Rozenberg S, Werner B, Cohen Y, et al. Direct monthly highly active antiretroviral therapy supply - a method to increase patient's adherence and outcome. Experience of one AIDS centre in Israel. *Int J STD AIDS*. 2014;25(8):579-86.

20. Elinav H, Pops KO, Shasha D, Korem M, Hauzi-Bashan M, Grossman Z, et al. HIV/AIDS profile and realities at a regional antiretroviral therapy clinic in Jerusalem: 12 years analysis. *Scand J Infect Dis*. janv 2012;44(1):65-9.

21. Fournier AL, Yazdanpanah Y, Verdon R, Lariven S, Mackoumbou-Nkouka C, Phung BC, et al. Incidence of and risk factors for medical care interruption in people living with HIV in recent years. Yotebieng M, éditeur. *PLOS ONE* [Internet]. 13 mars 2019 [cité 16 déc 2020];14(3):e0213526. Disponible sur: <https://dx.plos.org/10.1371/journal.pone.0213526>

22. Gagliardini R, Giacomelli A, Bozzi G, D'Arminio Monforte A, Tavelli A, Mazzotta V, et al. Impact of COVID-19 pandemic on retention in care of native and migrant people with HIV in the ICONA cohort. *Travel Med Infect Dis*. 2024;58:102691.

23. Gatey C, Brun A, Hamet G, Diamantis S, Sellier P, Bouchaud O, et al. Does region of origin influence the timing and outcome of first-line antiretroviral therapy in France? *HIV Med*. févr 2019;20(2):175-81.

24. Gebreegziabher EA, McCoy SI, Ycasas JC, Murgai N. The Role of Neighborhood Poverty in the Association between Foreign-Born status and HIV Care Continuum Outcomes in Alameda County, California. *J Immigr Minor Health*. 2020;22(5):1023-30.

25. Guionnet A, Navaza B, Pizarro de la Fuente B, Pérez-Elías MJ, Dronda F, López-Vélez R, et al. Immigrant women living with HIV in Spain: a qualitative approach to encourage medical follow-up. *BMC Public Health*. 29 oct 2014;14:1115.

26. Helleberg M, Häggblom A, Sönnernborg A, Obel N. HIV care in the Swedish-Danish HIV cohort 1995-2010, closing the gaps. *PloS One*. 2013;8(8):e72257.
27. Herrmann S, Wardrop J, John M, Gaudieri S, Lucas M, Mallal S, et al. The impact of visa status and Medicare eligibility on people diagnosed with HIV in Western Australia: a qualitative report. *Sex Health*. nov 2012;9(5):407-13.
28. Ivanova E, Coroiu A, Ahluwalia A, Alexandrov E, Lafreniere KD. Preliminary Findings on the Association Between Symptoms of Depression and Adherence to Antiretroviral Therapy in Individuals Born Inside Versus Outside of Canada. *J Assoc Nurses AIDS Care JANAC*. août 2016;27(4):512-23.
29. Jaries R, Vantilcke V, Clevenbergh P, Adoissi J, Boukhari R, Misslin C, et al. Population movements and the HIV cascade in recently diagnosed patients at the French Guiana -Suriname border. *AIDS Care*. nov 2017;29(11):1448-52.
30. Kankou JM, Bouchaud O, Lele N, Guiguet M, Spire B, Carrieri MP, et al. Factors Associated with Virological Rebound in HIV-Positive Sub-Saharan Migrants Living in France After Traveling Back to Their Native Country: ANRS-VIHVO 2006-2009 Study. *J Immigr Minor Health*. déc 2019;21(6):1342-8.
31. Krankowska D, Flanczewski S, Gajek-Flanczewska W, Sapuła M, Cybula A, Wiercińska-Drapało A. Comparison between patients who interrupted ART and those with late HIV diagnosis. *AIDS Care* [Internet]. mars 2024;36(3):374-81. Disponible sur: <https://ezproxy.u-paris.fr/login?url=https://search.ebscohost.com/login.aspx?direct=true&db=psych&AN=2024-01487-001&lang=fr&site=ehost-live>
32. Keiser O, Spycher B, Rauch A, Calmy A, Cavassini M, Glass TR, et al. Outcomes of antiretroviral therapy in the Swiss HIV Cohort Study: latent class analysis. *AIDS Behav*. févr 2012;16(2):245-55.
33. Kinoshita M, Oka S. Migrant patients living with HIV/AIDS in Japan: Review of factors associated with high dropout rate in a leading medical institution in Japan. *PloS One*. 2018;13(10):e0205184.
34. Lefebvre ME, Hughes CA, Yasui Y, Saunders LD, Houston S. Antiretroviral treatment outcomes among foreign-born and Aboriginal peoples living with HIV/AIDS in northern Alberta. *Can J Public Health Rev Can Sante Publique*. 11 juill 2014;105(4):e251-257.
35. Levison JH, Regan S, Khan I, Freedberg KA. Foreign-born status as a predictor of engagement in HIV care in a large US metropolitan health system. *AIDS Care*. févr 2017;29(2):244-51.
36. Levison JH, Bogart LM, Khan IF, Mejia D, Amaro H, Alegría M, et al. « Where It Falls Apart »: Barriers to Retention in HIV Care in Latino Immigrants and Migrants. *AIDS Patient Care STDs*. sept 2017;31(9):394-405.
37. Logie CH, Kennedy VL, Tharao W, Ahmed U, Loutfy MR. Engagement in and continuity of HIV care among African and Caribbean Black women living with HIV in Ontario, Canada. *Int J STD AIDS*. sept 2017;28(10):969-74.
38. Mambet Doue C, Roussiau N. The Role of Mediators in the Indirect Effects of Religiosity on Therapeutic Compliance in African Migrant HIV-Positive Patients. *J Relig Health*. déc 2016;55(6):1850-63.
39. Masindi KI, Jembere N, Kendall CE, Burchell AN, Bayoumi AM, Loutfy M, et al. Co-morbid Non-communicable Diseases and Associated Health Service Use in African and Caribbean Immigrants with HIV. *J Immigr Minor Health*. juin 2018;20(3):536-45.
40. Milz RU, Husstedt IW, Reichelt D, Evers S. Control beliefs and health locus of control in Ugandan, German and migrated sub-Saharan African HIV infected individuals. *J Psychosom Res* [Internet]. 1 avr 2016 [cité 7 juill 2021];83:22-6. Disponible sur: <https://www.sciencedirect.com/science/article/pii/S0022399916300320>
41. Monge S, Alejos B, Dronda F, Del Romero J, Iribarren JA, Pulido F, et al. Inequalities in HIV disease management and progression in migrants from Latin America and sub-Saharan Africa living in Spain. *HIV Med*. 2013;14(5):273-83.
42. Myers TR, Lin X, Skarbinski J. Antiretroviral Therapy and Viral Suppression Among Foreign-Born HIV-Infected Persons Receiving Medical Care in the United States: A Complex Sample, Cross-Sectional Survey. *Medicine (Baltimore)*. mars 2016;95(11):e3051.

43. Ojikutu BO, Nnaji C, Sithole-Berk J, Masongo D, Nichols K, Weeks N, et al. African born women living with HIV in the United States: unmet needs and opportunities for intervention. *AIDS Care*. déc 2018;30(12):1542-50.
44. Parisey M, Louni F, Bouvet E, Landman R, Charpentier C, Lariven S, et al. HIV Infection in North African Patients. *AIDS Res Hum Retroviruses*. juill 2019;35(7):628-33.
45. Pérez-Molina JA, Mora Rillo M, Suárez-Lozano I, Casado-Osorio JL, Teira Cobo R, Rivas González P, et al. Response to combined antiretroviral therapy according to gender and origin in a cohort of naïve HIV-infected patients: GESIDA-5808 study. *HIV Clin Trials*. juin 2012;13(3):131-41.
46. Poon KK, Dang BN, Davila JA, Hartman C, Giordano TP. Treatment outcomes in undocumented Hispanic immigrants with HIV infection. *PLoS One*. 2013;8(3):e60022.
47. Raho-Moussa M. Respective roles of migration and social deprivation for virological non-suppression in HIV-infected adults on antiretroviral therapy in France. [Internet]. [cité 3 mai 2019]. Disponible sur: <https://www.ncbi.nlm.nih.gov/pubmed/?term=mariem+raho+moussa+plos+one+migration+antiretroviral>
48. Remien RH, Bauman LJ, Mantell JE, Tsoi B, Lopez-Rios J, Chhabra R, et al. Barriers and Facilitators to Engagement of Vulnerable Populations in HIV Primary Care in New York City. *JAIDS J Acquir Immune Defic Syndr* [Internet]. 1 mai 2015 [cité 7 juill 2021];69(Supplement 1):S16-24. Disponible sur: <https://journals.lww.com/00126334-201505011-00003>
49. Ridolfo AL, Oreni L, Vassalini P, Resnati C, Bozzi G, Milazzo L, et al. Effect of Legal Status on the Early Treatment Outcomes of Migrants Beginning Combined Antiretroviral Therapy at an Outpatient Clinic in Milan, Italy. *J Acquir Immune Defic Syndr*. 2017;75(3):315-21.
50. Ross J, Felsen UR, Cunningham CO, Patel VV, Hanna DB. Outcomes Along the HIV Care Continuum Among Undocumented Immigrants in Clinical Care. *AIDS Res Hum Retroviruses*. oct 2017;33(10):1038-44.
51. Roux P, Marcellin F, Ndiaye K, Suzan-Monti M, Mayet A, Duracinsky M, et al. Posttraumatic Stress Disorder as a Significant Correlate of Voluntary Antiretroviral Treatment Interruption in Adult HIV-Infected Patients Followed up in French Hospitals: Data From the ANRS-VESPA2 National Survey. *J Clin Psychiatry*. juin 2018;79(3):17m11659.
52. Saracino A, Tartaglia A, Trillo G, Muschitiello C, Bellacosa C, Brindicci G, et al. Late presentation and Lost to follow-up of immigrants newly diagnosed with HIV in the HAART era. *J Immigr Minor Health*. août 2014;16(4):751-5.
53. Saracino A, Lorenzini P, Lo Caputo S, Girardi E, Castelli F, Bonfanti P, et al. Increased risk of virologic failure to the first antiretroviral regimen in HIV-infected migrants compared to natives: data from the ICONA cohort. *Clin Microbiol Infect Off Publ Eur Soc Clin Microbiol Infect Dis*. mars 2016;22(3):288.e1-8.
54. Saucedo JA, Brooks RA, Xavier J, Maiorana A, Georgetti Gomez L, Zamudio-Haas S, et al. From Theory to Application: A Description of Transnationalism in Culturally-Appropriate HIV Interventions of Outreach, Access, and Retention Among Latino/a Populations. *J Immigr Minor Health*. avr 2019;21(2):332-45.
55. Servin AE, Muñoz FA, Strathdee SA, Kozo J, Zúñiga ML. Choosing sides: HIV health care practices among shared populations of HIV-positive Latinos living near the US-Mexico border. *J Int Assoc Physicians AIDS Care Chic Ill* 2002. déc 2012;11(6):348-55.
56. Sheehan DM, Mauck DE, Fennie KP, Cyrus EA, Maddox LM, Lieb S, et al. Black-White and Country of Birth Disparities in Retention in HIV Care and Viral Suppression among Latinos with HIV in Florida, 2015. *Int J Environ Res Public Health*. 27 janv 2017;14(2):E120.
57. Sheehan DM, Cosner C, Fennie KP, Gebrezgi MT, Cyrus E, Maddox LM, et al. Role of Country of Birth, Testing Site, and Neighborhood Characteristics on Nonlinkage to HIV Care Among Latinos. *AIDS Patient Care STDs*. avr 2018;32(4):165-73.
58. Sumari-de Boer IM, Sprangers MAG, Prins JM, Nieuwkerk PT. HIV stigma and depressive symptoms are related to adherence and virological response to antiretroviral treatment among immigrant and indigenous HIV infected patients. *AIDS Behav*. août 2012;16(6):1681-9.

59. Tariq S, Elford J, Chau C, French C, Cortina-Borja M, Brown A, et al. Lost to follow-up After Pregnancy Among Sub-Saharan Africa-Born Women Living With Human Immunodeficiency Virus in England, Wales and Northern Ireland: Results From a Large National Cohort. *Sex Transm Dis*. mai 2016;43(5):283-9.
60. Taylor BS, Liang Y, Garduño LS, Walter EA, Gerardi MB, Anstead GM, et al. High risk of obesity and weight gain for HIV-infected uninsured minorities. *J Acquir Immune Defic Syndr* 1999. 1 févr 2014;65(2):e33-40.
61. Teira R, Espinosa N, Gutiérrez MM, Montero M, Martínez E, González F, et al. Losses to follow-up of HIV-infected people in the Spanish VACH cohort over the period between 2013 and 2014: The importance of sociodemographic factors. *Enfermedades Infecc Microbiol Clin Engl Ed*. juill 2019;37(6):361-6.
62. Thierfelder C, Weber R, Elzi L, Furrer H, Cavassini M, Calmy A, et al. Participation, characteristics and retention rates of HIV-positive immigrants in the Swiss HIV Cohort Study. *HIV Med*. 2012;13(2):118-26.
63. Thomadakis C, Basoulis D, Tsachouridou O, Protopapas K, Papanizos V, Astriti M, et al. HCV Cascade of Care in HIV/HCV Co-Infected Individuals: Missed Opportunities for Micro-Elimination. *Viruses*. 30 mai 2024;16(6):885.
64. Tilley DM, Griggs E, Hoy J, Wright ST, Woolley I, Burke M, et al. Treatment and disease outcomes of migrants from low- and middle-income countries in the Australian HIV Observational Database cohort. *AIDS Care*. 2015;27(11):1410-7.
65. Torrecilla García E, Yebra Sanz G, Llácer-Delicado T, Rubio García R, González-García J, García García F, et al. Clinical, epidemiological and treatment failure data among HIV-1 non-B-infected patients in the Spanish AIDS Research Network Cohort. *Enferm Infecc Microbiol Clin*. juill 2016;34(6):353-60.
66. Van Beckhoven D, Florence E, Ruelle J, Deblonde J, Verhofstede C, Callens S, et al. Good continuum of HIV care in Belgium despite weaknesses in retention and linkage to care among migrants. *BMC Infect Dis*. 3 nov 2015;15:496.
67. Vignier N, Spira RD, Bouchaud O, du Loû AD, Chauvin P. Refusal to provide health care to sub-Saharan African migrants in France. *Lancet Public Health*. janv 2018;3(1):e12.
68. Winston SE, Montague BT, Lopez MJ, DeLong A, Lemarchand C, Bedoya A, et al. Evaluation of longitudinal clinical outcomes and adherence to care among HIV-infected refugees. *J Int Assoc Provid AIDS Care*. juin 2013;12(3):202-7.
69. Zamudio-Haas S, Maiorana A, Gomez LG, Myers J. « No Estas Solo »: Navigation Programs Support Engagement in HIV Care for Mexicans and Puerto Ricans Living in the Continental U.S. *J Health Care Poor Underserved*. 2019;30(2):866-87.



**S2: Search string.****PUBMED**

((*"HIV"*[MH] OR *"HIV"*[TIAB]) AND (*"Treatment Failure"*[MH] OR *"Treatment Failure"*[TIAB] OR *"treatment refusal"*[MH] OR *"treatment refusal"*[TIAB] OR *"treatment adherence and compliance"*[MH] OR *"treatment compliance"*[TIAB] OR *"treatment adherence"*[TIAB] OR *"Retention in care"*[MH] OR *"Retention in care"*[TIAB] OR *"Treatment outcome"*[MH] OR *"Treatment outcome"*[TIAB] OR *"Lost-to follow up"*[MH] OR *"Lost-to follow up"*[TIAB] OR *"Continuity of Patient Care"*[MH] OR *"Continuity of Patient Care"*[TIAB]) AND (*"transients and migrants"*[MH] OR *transient\**[TIAB] OR *migrant\**[TIAB] OR *"refugee"*[MH] OR *"refugee"*[TIAB] OR *"emigrants and immigrants"* » [MH] OR « *emigrants* » [TIAB] OR *"immigrant"* [TIAB] OR « *emigration and immigration* » [MH] OR *"emigration"*[TIAB] OR *"immigration"* [TIAB] OR *"asylum seeker"* OR *"asylum seeker"*[TIAB])

**PSYCHINFO**

TI *"HIV"* AND TI ( *"treatment failure"* OR *"treatment refusal"* OR *"treatment adherence and compliance"* OR *"treatment compliance"* OR *"treatment adherence"* OR *"retention in care"* OR *"treatment outcome"* OR *"lost to follow up"* OR *"continuity of patient care"* ) AND TI ( *"transients and migrants"* OR *"transient"* OR *"migrant"* OR *"refugee"* OR *"emigrants and immigrants"* OR *"emigrant"* OR *"immigrant"* OR *"emigration and immigration"* OR *"emigration"* OR *"immigration"* OR *"asylum seeker"* )

AB *"HIV"* AND AB ( *"treatment failure"* OR *"treatment refusal"* OR *"treatment adherence and compliance"* OR *"treatment compliance"* OR *"treatment adherence"* OR *"retention in care"* OR *"treatment outcome"* OR *"lost to follow up"* OR *"continuity of patient care"* ) AND AB ( *"transients and migrants"* OR *"transient"* OR *"migrant"* OR *"refugee"* OR *"emigrants and immigrants"* OR *"emigrant"* OR *"immigrant"* OR *"emigration and immigration"* OR *"emigration"* OR *"immigration"* OR *"asylum seeker"* )

**CINAHL**

TI *"HIV"* AND TI ( *"treatment failure"* OR *"treatment refusal"* OR *"treatment adherence and compliance"* OR *"treatment compliance"* OR *"treatment adherence"* OR *"retention in care"* OR *"treatment outcome"* OR *"lost to follow up"* OR *"continuity of patient care"* ) AND TI ( *"transients and migrants"* OR *"transient"* OR *"migrant"* OR *"refugee"* OR *"emigrants and immigrants"* OR *"emigrants"* OR *"immigrant"* OR *"emigration and immigration"* OR *"emigration"* OR *"immigration"* OR *"asylum seeker"* )

AB *"hiv"* AND AB ( *"treatment failure"* OR *"treatment refusal"* OR *"treatment adherence and compliance"* OR *"treatment compliance"* OR *"treatment adherence"* OR *"retention in care"* OR *"treatment outcome"* OR *"lost to follow up"* OR *"continuity of patient care"* ) AND AB ( *"transients and migrants"* OR *"transient"* OR *"migrant"* OR *"refugee"* OR *"emigrants and immigrants"* OR *"emigrants"* OR *"immigrant"* OR *"emigration and immigration"* OR *"emigration"* OR *"immigration"* OR *"asylum seeker"* )

**EMBASE**

(*'human immunodeficiency virus'*:ab,ti,kw AND [*humans*]/lim AND [*embase*]/lim AND [2010-2024]/py) AND ((*'migration'*:ab,ti,kw OR *'refugee'*:ab,ti,kw OR «*migrant*»:ab,ti,kw OR «*migration*»:ab,ti,kw OR *'asylum seeker'*:ab,ti,kw) AND [*embase*]/lim AND [2010-2024]/py) AND ((*'treatment failure'*:ab,ti,kw OR *'treatment refusal'*:ab,ti,kw OR *'patient compliance'*:ab,ti,kw OR *'retention in care'*:ab,ti,kw OR *'treatment outcome'*:ab,ti,kw OR *'follow up'*:ab,ti,kw OR *'patient care'*:ab,ti,kw) AND [*humans*]/lim AND [*embase*]/lim AND [2010-2024]/py )

**GOOGLE SCHOLAR:**

*"HIV"* AND *"migrants"* and *" care process "* and *"High-income countries"*

**S3: Quality assessment of included studies using the Mixed Methods Appraisal Tool**

|                                                                                                                                                                                    | SCREENING QUESTIONS                     |                                                                    | 3. NON-RANDOMIZED STUDIES                                          |                                                                                              |                                       |                                                                    |                                                                                                    |
|------------------------------------------------------------------------------------------------------------------------------------------------------------------------------------|-----------------------------------------|--------------------------------------------------------------------|--------------------------------------------------------------------|----------------------------------------------------------------------------------------------|---------------------------------------|--------------------------------------------------------------------|----------------------------------------------------------------------------------------------------|
| Authors' names<br>Year of publication<br>Title                                                                                                                                     | S1. Are there clear research questions? | S2. Do the collected data allow to address the research questions? | 3.1. Are the participants representative of the target population? | 3.2. Are measurements appropriate regarding both the outcome and intervention (or exposure)? | 3.3. Are there complete outcome data? | 3.4. Are the confounders accounted for in the design and analysis? | 3.5. During the study period, is the intervention administered (or exposure occurred) as intended? |
| <b>Abgrall 2013</b><br>Visiting One's Native Country : The Risks of Non adherence in HIV-Infected Sub-Saharan Migrants (1)                                                         | Yes                                     | Yes                                                                | Yes                                                                | Yes                                                                                          | Yes                                   | Yes                                                                | Yes                                                                                                |
| <b>Abgrall 2014</b><br>Risk factors for adherence failure in HIV-infected sub-Saharan migrants living in France and travelling back to their native country (2)                    | Yes                                     | Yes                                                                | Yes                                                                | Yes                                                                                          | Yes                                   | Yes                                                                | Yes                                                                                                |
| <b>Arora 2024</b><br>Patient-reported outcomes and experiences of migrants enrolled in a multidisciplinary HIV clinic with rapid, free, and onsite treatment: the 'ASAP' study (4) | Yes                                     | Yes                                                                | Yes                                                                | Yes                                                                                          | No                                    | Yes                                                                | Yes                                                                                                |
| <b>Been 2016</b><br>Risk Factors for Non-Adherence to cART in Immigrants with HIV living in the Netherlands: Results from the Rotterdam Adherence project (6)                      | Yes                                     | Yes                                                                | No                                                                 | Yes                                                                                          | Yes                                   | Yes                                                                | Yes                                                                                                |
| <b>Been 2017</b><br>Self-reported adherence and pharmacy refill adherence are both predictive of an undetectable viral load among HIV-infected migrants receiving cART (7)         | Yes                                     | Yes                                                                | Yes                                                                | Yes                                                                                          | No                                    | Yes                                                                | Yes                                                                                                |
| <b>Been 2019</b><br>Anxiety, depression and treatment adherence among HIV-infected migrants (8)                                                                                    | Yes                                     | Yes                                                                | Yes                                                                | Yes                                                                                          | No                                    | Yes                                                                | Yes                                                                                                |
| <b>Been 2020</b><br>Feasibility of four interventions to improve treatment adherence in migrants living with HIV in the Netherlands (9)                                            | Yes                                     | Yes                                                                | Yes                                                                | Yes                                                                                          | Yes                                   | Yes                                                                | Yes                                                                                                |
| <b>Borchmann 2022</b><br>Length of stay in Denmark before HIV                                                                                                                      | Yes                                     | Yes                                                                | Yes                                                                | Yes                                                                                          | Yes                                   | No                                                                 | Yes                                                                                                |

|                                                                                                                                                                                                                        |     |     |     |            |     |     |     |
|------------------------------------------------------------------------------------------------------------------------------------------------------------------------------------------------------------------------|-----|-----|-----|------------|-----|-----|-----|
| diagnosis and linkage to care: a population-based study of migrants living with HIV, Denmark, 1995 to 2020 (10)                                                                                                        |     |     |     |            |     |     |     |
| <b>Castelan 2023</b><br>Intentional but not Unintentional Medication Non-adherence was related with beliefs about medicines among a multi-ethnic sample of people with HIV(11)                                         | Yes | Yes | Yes | Yes        | Yes | No  | Yes |
| <b>COHERE</b><br>Immunological and virological response to antiretroviral treatment in migrant and native men and women in Western Europe; is benefit equal for all? (12)                                              | Yes | Yes | Yes | Can't tell | Yes | Yes | Yes |
| <b>Cyrus 2017</b><br>Disparity in Retention in Care and Viral Suppression for Black Caribbean-Born Immigrants Living with HIV in Florida (13)                                                                          | Yes | Yes | Yes | Yes        | Yes | Yes | Yes |
| <b>Demeke 2018</b><br>HIV Infection-Related Care Outcomes among US-born and Non-US born Blacks with Diagnosed HIV in 40 US Areas: The national HIV Surveillance system, 2016 (15)                                      | Yes | Yes | Yes | Yes        | Yes | No  | No  |
| <b>Demeke 2021</b><br>Antiretroviral prescription, retention in care and viral suppression according to place of birth among adults with diagnosed HIV in the United States 2015-2017, medical monitoring project (16) | Yes | Yes | No  | Yes        | Yes | No  | Yes |
| <b>De Monteynard 2015</b><br>Late cART initiation in Migrant Men from Sub-Saharan Africa without advanced HIV disease in France (17)                                                                                   | Yes | Yes | Yes | Yes        | Yes | Yes | Yes |
| <b>De Monteynard 2016</b><br>Influence of geographic origin, sex, and HIV transmission group on the outcome of first-line combined antiretroviral therapy in France (18)                                               | Yes | Yes | Yes | Yes        | Yes | Yes | Yes |
| <b>Elbirt 2014</b><br>Direct monthly highly active antiretroviral therapy supply: a method to increase patient's adherence and outcome (19)                                                                            | Yes | Yes | Yes | Yes        | Yes | No  | Yes |



|                                                                                                                                                                                                |     |     |     |     |            |     |     |
|------------------------------------------------------------------------------------------------------------------------------------------------------------------------------------------------|-----|-----|-----|-----|------------|-----|-----|
|                                                                                                                                                                                                |     |     |     |     |            |     |     |
| <b>Elinav 2012</b><br>HIV/AIDS profile and realities at a regional antiretroviral therapy clinic in Jerusalem: 12 years analysis (20)                                                          | Yes | Yes | Yes | Yes | No         | No  | Yes |
| <b>Fournier 2019</b><br>Incidence of risk factors for medical care interruption in people living with HIV in recent years (21)                                                                 | Yes | Yes | Yes | Yes | Yes        | Yes | Yes |
| <b>Gagliardini 2024</b><br>Impact of COVID-19 pandemic on retention in care of native and migrant people with HIV in the ICONA cohort (22)                                                     | Yes | Yes | Yes | Yes | Yes        | Yes | Yes |
| <b>Gatey 2019</b><br>Does region of origin influence the timing and outcome of first-line antiretroviral therapy in France ? (23)                                                              | Yes | Yes | Yes | Yes | Yes        | Yes | Yes |
| <b>Gebregeziabher 2020</b><br>The role of Neighborhood Poverty in the Association between Foreign-Born status and HIV Care Continuum Outcomes in Alameda County, California (24)               | Yes | Yes | Yes | Yes | No         | Yes | Yes |
| <b>Helleberg 2013</b><br>HIV Care in the Swedish-Danish HIV cohort 1995-2010, Closing the Gaps (26)                                                                                            | Yes | Yes | Yes | Yes | Can't tell | No  | Yes |
| <b>Ivanova 2016</b><br>Preliminary Findings on the Association Between Symptoms of Depression and Adherence to Antiretroviral Therapy in Individuals Born Inside Versus Outside of Canada (28) | Yes | Yes | No  | Yes | Yes        | Yes | No  |
| <b>Jaries 2017</b><br>Population movements and the HIV cascade in recently diagnosed patients at the French Guiana-Suriname Border (29)                                                        | Yes | Yes | Yes | Yes | Yes        | No  | Yes |
| <b>Kankou 2019</b><br>Factors Associated with Virological Rebound in HIV-Positive Sub-Saharan Migrants Living in France After Traveling Back to Their Native                                   | Yes | Yes | No  | Yes | Yes        | Yes | Yes |

|                                                                                                                                                                              |     |     |     |     |     |     |     |
|------------------------------------------------------------------------------------------------------------------------------------------------------------------------------|-----|-----|-----|-----|-----|-----|-----|
| Country: ANRS-VIHVO 2006-2009 Study (30)                                                                                                                                     |     |     |     |     |     |     |     |
| <b>Krankowska 2024</b><br>Comparison between patients who interrupted ART and those with late HIV diagnosis (31)                                                             | Yes |
| <b>Keiser 2012</b><br>Outcomes of Antiretroviral Therapy in the Swiss HIV Cohort Study: Latent Class Analysis (32).                                                          | Yes |
| <b>Kinoshita 2018</b><br>Migrant patients living with HIV/AIDS in Japan: Review of factors associated with high dropout rate in a leading medical institution in Japan (33). | Yes | Yes | No  | Yes | No  | Yes | Yes |
| <b>Lefebvre 2014</b><br>Antiretroviral treatment outcomes among foreign-born and Aboriginal peoples living with HIV/AIDS in northern Alberta (34).                           | Yes | Yes | Yes | Yes | No  | Yes | Yes |
| <b>Levison 2017</b><br>Foreign-born status as a predictor of engagement in HIV care in a large US metropolitan health system (35).                                           | Yes | Yes | Yes | Yes | No  | Yes | Yes |
| <b>Logie 2017</b><br>Engagement in and continuity of HIV care among African and Caribbean Black women living with HIV in Ontario, Canada (37)                                | Yes | Yes | No  | Yes | Yes | Yes | Yes |
| <b>MambetDoue 2016</b><br>The Role of Mediators in the Indirect Effects of Religiosity on Therapeutic Compliance in African Migrant HIV-Positive Patients (38)               | Yes |
| <b>Masindi 2018</b><br>Co-morbid Non-communicable Diseases and Associated Health Service Use in African and Caribbean Immigrants with HIV(39)                                | Yes |
| <b>Milz 2016</b><br>Control beliefs and health locus of control in Ugandan, German and migrated sub-Saharan African HIV infected individuals (40)                            | Yes | Yes | Yes | Yes | Yes | No  | Yes |
| <b>Monge 2013</b><br>Inequalities in HIV disease management and progression in migrants from Latin America and sub-                                                          | Yes |

|                                                                                                                                                                                                                                                |     |     |     |     |     |     |     |
|------------------------------------------------------------------------------------------------------------------------------------------------------------------------------------------------------------------------------------------------|-----|-----|-----|-----|-----|-----|-----|
| Saharan Africa living in Spain (41)                                                                                                                                                                                                            |     |     |     |     |     |     |     |
| <b>Myers 2016</b><br>Antiretroviral Therapy and Viral Suppression Among Foreign-Born HIV-Infected Persons Receiving Medical Care in the United States: A Complex Sample, Cross-Sectional Survey (42).                                          | Yes | Yes | No  | Yes | Yes | Yes | Yes |
| <b>Parisey 2019</b><br>HIV Infection in North African Patients (44)                                                                                                                                                                            | Yes | Yes | Yes | Yes | No  | Yes | Yes |
| <b>Pérez-Molina 2012</b><br>Response to combined antiretroviral therapy according to gender and origin in a cohort of naive HIV-infected patients: GESIDA-5808 study (45)                                                                      | Yes |
| <b>Poon 2013</b><br>Treatment outcomes in undocumented Hispanic immigrants with HIV infection (46)                                                                                                                                             | Yes |
| <b>Raho-Moussa 2019</b><br>Immunological and virological response to antiretroviral treatment in migrant and native men and women in Western Europe; is benefit equal for all? (47)                                                            | Yes |
| <b>Ridolfo 2017</b><br>Effect of Legal Status on the Early Treatment Outcomes of Migrants Beginning Combined Antiretroviral Therapy at an Outpatient Clinic in Milan, Italy (49)                                                               | Yes | Yes | No  | Yes | Yes | Yes | Yes |
| <b>Ross 2017</b><br>Outcomes Along the HIV Care Continuum Among Undocumented Immigrants in Clinical Care (50)                                                                                                                                  | Yes |
| <b>Roux 2018</b><br>Posttraumatic Stress Disorder as a Significant Correlate of Voluntary Antiretroviral Treatment Interruption in Adult HIV-Infected Patients Followed up in French Hospitals: Data From the ANRS-VESPA2 National Survey (51) | Yes |
| <b>Saracino 2014</b><br>Late presentation and Lost to follow-up of immigrants newly diagnosed with HIV in the HAART era (52)                                                                                                                   | Yes | Yes | Yes | Yes | Yes | No  | Yes |

|                                                                                                                                                                                                                       |     |     |     |     |     |     |     |
|-----------------------------------------------------------------------------------------------------------------------------------------------------------------------------------------------------------------------|-----|-----|-----|-----|-----|-----|-----|
| <b>Saracino 2016</b> ,<br>Increased risk of virologic failure to the first antiretroviral regimen in HIV-infected migrants compared to natives: data from the ICONA cohort (53)                                       | Yes |
| <b>Servin 2012</b><br>Choosing sides: HIV health care practices among shared populations of HIV-positive Latinos living near the US-Mexico border (55)                                                                | Yes | Yes | No  | Yes | Yes | Yes | Yes |
| <b>Sheehan 2017</b><br>Black-White and Country of Birth Disparities in Retention in HIV Care and Viral Suppression among Latinos with HIV in Florida, 2015 (56)                                                       | Yes | Yes | No  | Yes | Yes | Yes | Yes |
| <b>Sheehan 2018</b><br>Role of Country of Birth, Testing Site, and Neighborhood Characteristics on Non-linkage to HIV Care Among Latinos (57)                                                                         | Yes |
| <b>Sumari-de Boer 2012</b><br>HIV stigma and depressive symptoms are related to adherence and virological response to antiretroviral treatment among immigrant and indigenous HIV infected patients (58)              | Yes |
| <b>Tariq 2016</b><br>Lost to follow-up After Pregnancy Among Sub-Saharan Africa-Born Women Living With Human Immunodeficiency Virus in England, Wales and Northern Ireland: Results From a Large National Cohort (59) | Yes |
| <b>Teira 2019</b><br>Losses to follow-up of HIV-infected people in the Spanish VACH cohort over the period between 2013 and 2014: The importance of sociodemographic factors (61)                                     | Yes |
| <b>Thierfelder 2012</b><br>Participation, characteristics and retention rates of HIV-positive immigrants in the Swiss HIV Cohort Study (62)                                                                           | Yes | Yes | No  | Yes | Yes | Yes | Yes |
| <b>Thomadakis, 2024</b><br>HCV Cascade of care in HIV/HCV Co-Infected Individuals: Missed Opportunities for Micro-Elimination                                                                                         | Yes | Yes | Yes | Yes | No  | Yes | Yes |

|                                                                                                                                                                                          |                                         |                                                                    |                                                                               |                                                                                             |                                                         |                                                                           |                                                                                                    |
|------------------------------------------------------------------------------------------------------------------------------------------------------------------------------------------|-----------------------------------------|--------------------------------------------------------------------|-------------------------------------------------------------------------------|---------------------------------------------------------------------------------------------|---------------------------------------------------------|---------------------------------------------------------------------------|----------------------------------------------------------------------------------------------------|
| (63)<br><b>Tilley 2015</b><br>Treatment and disease outcomes of migrants from low- and middle-income countries in the Australian HIV Observational Database cohort (64)                  | Yes                                     | Yes                                                                | No                                                                            | Yes                                                                                         | Yes                                                     | Yes                                                                       | Yes                                                                                                |
| <b>Torrecilla García 2016</b><br>Clinical, epidemiological and treatment failure data among HIV-1 non-B-infected patients in the Spanish AIDS Research Network Cohort (65)               | Yes                                     | Yes                                                                | No                                                                            | Yes                                                                                         | No                                                      | No                                                                        | Yes                                                                                                |
| <b>VanBeckhoven 2015</b><br>Good continuum of HIV care in Belgium despite weaknesses in retention and linkage to care among migrants (66)                                                | Yes                                     | Yes                                                                | Yes                                                                           | Yes                                                                                         | Yes                                                     | Yes                                                                       | Yes                                                                                                |
| <b>Vignier 2018</b><br>Refusal to provide healthcare to sub-Saharan migrants in France: a comparison according to their HIV and HBV status (67)                                          | Yes                                     | Yes                                                                | Yes                                                                           | Yes                                                                                         | Yes                                                     | Yes                                                                       | Yes                                                                                                |
| <b>Winston 2013</b><br>Evaluation of longitudinal clinical outcomes and adherence to care among HIV-infected refugees (68)                                                               | Yes                                     | Yes                                                                | Yes                                                                           | Yes                                                                                         | Yes                                                     | No                                                                        | Yes                                                                                                |
|                                                                                                                                                                                          | SCREENING QUESTIONS                     |                                                                    | 1. QUALITATIVE STUDIES                                                        |                                                                                             |                                                         |                                                                           |                                                                                                    |
| <b>Authors' names</b><br><b>Year of publication</b><br><b>Title</b>                                                                                                                      | S1. Are there clear research questions? | S2. Do the collected data allow to address the research questions? | 1.1. Is the qualitative approach appropriate to answer the research question? | 1.2. Are the qualitative data collection methods adequate to address the research question? | 1.3. Are the findings adequately derived from the data? | 1.4. Is the interpretation of results sufficiently substantiated by data? | 1.5. Is there coherence between qualitative data sources, collection, analysis and interpretation? |
| <b>Arnold 2020</b><br>Documenting best practices for maintaining access to HIV prevention, care and treatment in an era of shifting immigration policy and discourse (3)                 | Yes                                     | Yes                                                                | Yes                                                                           | Yes                                                                                         |                                                         | Yes                                                                       | Yes                                                                                                |
| <b>Arrey 2017</b><br>Perceptions of stigma and discrimination in health care settings towards sub-Saharan African migrant women living with HIV/AIDS in Belgium: a qualitative study (5) | Yes                                     | Yes                                                                | Yes                                                                           | Yes                                                                                         | Yes                                                     | Yes                                                                       | Yes                                                                                                |
| <b>Dang 2012</b><br>Sociocultural and Structural Barriers to Care Among Undocumented Latino                                                                                              | Yes                                     | Yes                                                                | Yes                                                                           | Yes                                                                                         | Yes                                                     | Yes                                                                       | Yes                                                                                                |

|                                                                                                                                                                                                     |     |     |     |     |     |     |     |
|-----------------------------------------------------------------------------------------------------------------------------------------------------------------------------------------------------|-----|-----|-----|-----|-----|-----|-----|
| Immigrants with HIV Infection (14)                                                                                                                                                                  |     |     |     |     |     |     |     |
| <b>Guionnet 2014</b><br>Immigrant women living with HIV in Spain: a qualitative approach to encourage medical follow-up (25)                                                                        | Yes |
| <b>Herrmann 2012</b><br>The impact of visa status and Medicare eligibility on people diagnosed with HIV in Western Australia (27).                                                                  | Yes |
| <b>Levison 2017</b><br>"Where It Falls Apart": Barriers to Retention in HIV Care in Latino Immigrants and Migrants (36).                                                                            | Yes |
| <b>Ojikutu 2018</b><br>African born women living with HIV in the United States: unmet needs and opportunities for intervention (43)                                                                 | Yes |
| <b>Remien 2015</b><br>Barriers and facilitators to engagement of vulnerable populations in HIV primary care in New York City (48)                                                                   | Yes |
| <b>Sauceda 2019</b><br>From Theory to Application: A Description of Transnationalism in Culturally-Appropriate HIV Interventions of Outreach, Access, and Retention Among Latino/a Populations (54) | Yes |
| <b>Taylor 2014</b><br>Patterns of geographic mobility predict barriers to engagement in HIV care and antiretroviral treatment adherence (60)                                                        | Yes | Yes | Yes | Yes | Yes | No  | Yes |
| <b>Zamudio-Haas 2019</b><br>"No Estas Solo": Navigation Programs Support Engagement in HIV Care for Mexicans and Puerto Ricans Living in the Continental U.S (69)                                   | Yes |
